# Supplementary material for: Synthesis of Flavonols and Assessment of Their Biological Activity as Anticancer Agents
Source: MDPI journal article supplement (doi:10.3390/molecules29092041), 2024-04-28
Supplement: s1 [file s1]

# Supplementary data

## Synthesis of Flavonols and Assessment of Their Biological Activities as Anticancer Agents

Yu-Hui Hsieh <sup>1</sup>, Pei-Hsuan Hsu <sup>2</sup>, Anren Hu <sup>3</sup>, Yang-Je Cheng <sup>2</sup>, Tzenge-Lien Shih <sup>2,\*</sup> and Jih-Jung Chen <sup>1,4,5,6,\*</sup>

<sup>1</sup> Biomedical Industry Ph.D. Program, School of Life Sciences, National Yang Ming Chiao Tung University, Taipei 112304, Taiwan; hsieh.ls10@nycu.edu.tw (Y.-H.H.)

<sup>2</sup> Department of Chemistry, Tamkang University, New Taipei City 251301, Taiwan; peggy060708@gmail.com (P.-H.H.); jason0110422@gmail.com (Y.-J.C.)

<sup>3</sup> Department of Laboratory Medicine and Biotechnology, Tzu Chi University, Hualien 970374, Taiwan; anren@mail.tcu.edu.tw (A.H.)

<sup>4</sup> Department of Pharmacy, School of Pharmaceutical Sciences, National Yang Ming Chiao Tung University, Taipei 112304, Taiwan

<sup>5</sup> Department of Medical Research, China Medical University Hospital, China Medical University, Taichung 404333, Taiwan

<sup>6</sup> Traditional Herbal Medicine Research Center, Taipei Medical University Hospital, Taipei 110301, Taiwan

\* Correspondence: jjungchen@nycu.edu.tw (J.-J.C.)\*; Tel.: +886-2-2826-7195 (J.-J.C.)\*; Fax: +886-2-2823-2940 (J.-J.C.)\*; tlshih@mail.tku.edu.tw (T.-L.S.)\*; Tel.: +886-2-8631-5024 (T.-L.S.)\*

## Contents

|                                                                                            |     |
|--------------------------------------------------------------------------------------------|-----|
| Figure S1. $^1\text{H}$ NMR (600 MHz, $\text{DMSO-}d_6$ ) for compound <b>6a</b> .....     | S4  |
| Figure S2. $^{13}\text{C}$ NMR (150 MHz, $\text{DMSO-}d_6$ ) for compound <b>6a</b> .....  | S5  |
| Figure S3. $^1\text{H}$ NMR (600 MHz, $\text{DMSO-}d_6$ ) for compound <b>6b</b> .....     | S6  |
| Figure S4. $^{13}\text{C}$ NMR (150 MHz, $\text{DMSO-}d_6$ ) for compound <b>6b</b> .....  | S7  |
| Figure S5. $^1\text{H}$ NMR (600 MHz, $\text{DMSO-}d_6$ ) for compound <b>6c</b> .....     | S8  |
| Figure S6. $^{13}\text{C}$ NMR (150 MHz, $\text{DMSO-}d_6$ ) for compound <b>6c</b> .....  | S9  |
| Figure S7. $^1\text{H}$ NMR (600 MHz, $\text{DMSO-}d_6$ ) for compound <b>6d</b> .....     | S10 |
| Figure S8. $^{13}\text{C}$ NMR (150 MHz, $\text{DMSO-}d_6$ ) for compound <b>6d</b> .....  | S11 |
| Figure S9. $^1\text{H}$ NMR (600 MHz, $\text{DMSO-}d_6$ ) for compound <b>6e</b> .....     | S12 |
| Figure S10. $^{13}\text{C}$ NMR (150 MHz, $\text{DMSO-}d_6$ ) for compound <b>6e</b> ..... | S13 |
| Figure S11. $^1\text{H}$ NMR (600 MHz, $\text{DMSO-}d_6$ ) for compound <b>6f</b> .....    | S14 |
| Figure S12. $^{13}\text{C}$ NMR (150 MHz, $\text{DMSO-}d_6$ ) for compound <b>6f</b> ..... | S15 |
| Figure S13. $^1\text{H}$ NMR (600 MHz, $\text{DMSO-}d_6$ ) for compound <b>6g</b> .....    | S16 |
| Figure S14. $^{13}\text{C}$ NMR (150 MHz, $\text{DMSO-}d_6$ ) for compound <b>6g</b> ..... | S17 |
| Figure S15. $^1\text{H}$ NMR (600 MHz, $\text{DMSO-}d_6$ ) for compound <b>6h</b> .....    | S18 |
| Figure S16. $^{13}\text{C}$ NMR (150 MHz, $\text{DMSO-}d_6$ ) for compound <b>6h</b> ..... | S19 |
| Figure S17. $^1\text{H}$ NMR (600 MHz, $\text{DMSO-}d_6$ ) for compound <b>6i</b> .....    | S20 |
| Figure S18. $^{13}\text{C}$ NMR (150 MHz, $\text{DMSO-}d_6$ ) for compound <b>6i</b> ..... | S21 |
| Figure S19. $^1\text{H}$ NMR (600 MHz, $\text{DMSO-}d_6$ ) for compound <b>6j</b> .....    | S22 |

|                                                                                                  |     |
|--------------------------------------------------------------------------------------------------|-----|
| Figure S20. $^{13}\text{C}$ NMR (150 MHz, $\text{DMSO-}d_6$ ) for compound <b>6j</b> .....       | S23 |
| Figure S21. $^1\text{H}$ NMR (600 MHz, $\text{DMSO-}d_6$ ) for compound <b>6k</b> .....          | S24 |
| Figure S22. $^{13}\text{C}$ NMR (150 MHz, $\text{DMSO-}d_6$ ) for compound <b>6k</b> .....       | S25 |
| Figure S23. $^1\text{H}$ NMR (600 MHz, $\text{DMSO-}d_6$ ) for compound <b>6l</b> .....          | S26 |
| Figure S24. $^{13}\text{C}$ NMR (150 MHz, $\text{DMSO-}d_6$ ) for compound <b>6l</b> .....       | S27 |
| Figure S25. $^1\text{H}$ NMR (600 MHz, $\text{DMSO-}d_6$ ) for compound <b>7i</b> .....          | S28 |
| Figure S26. $^{13}\text{C}$ NMR (150 MHz, $\text{DMSO-}d_6$ ) for compound <b>7i</b> .....       | S29 |
| Figure S27. $^1\text{H}$ NMR (600 MHz, $\text{DMSO-}d_6$ ) for compound <b>7j</b> .....          | S30 |
| Figure S28. $^{13}\text{C}$ NMR (150 MHz, $\text{DMSO-}d_6$ ) for compound <b>7j</b> .....       | S31 |
| Figure S29. $^1\text{H}$ NMR (600 MHz, $\text{DMSO-}d_6$ ) for compound <b>7k</b> .....          | S32 |
| Figure S30. $^{13}\text{C}$ NMR (150 MHz, $\text{DMSO-}d_6$ ) for compound <b>7k</b> .....       | S33 |
| Figure S31. $^1\text{H}$ NMR (600 MHz, $\text{DMSO-}d_6$ ) for compound <b>7l</b> .....          | S34 |
| Figure S32. $^{13}\text{C}$ NMR (150 MHz, $\text{DMSO-}d_6$ ) for compound <b>7l</b> .....,..... | S35 |

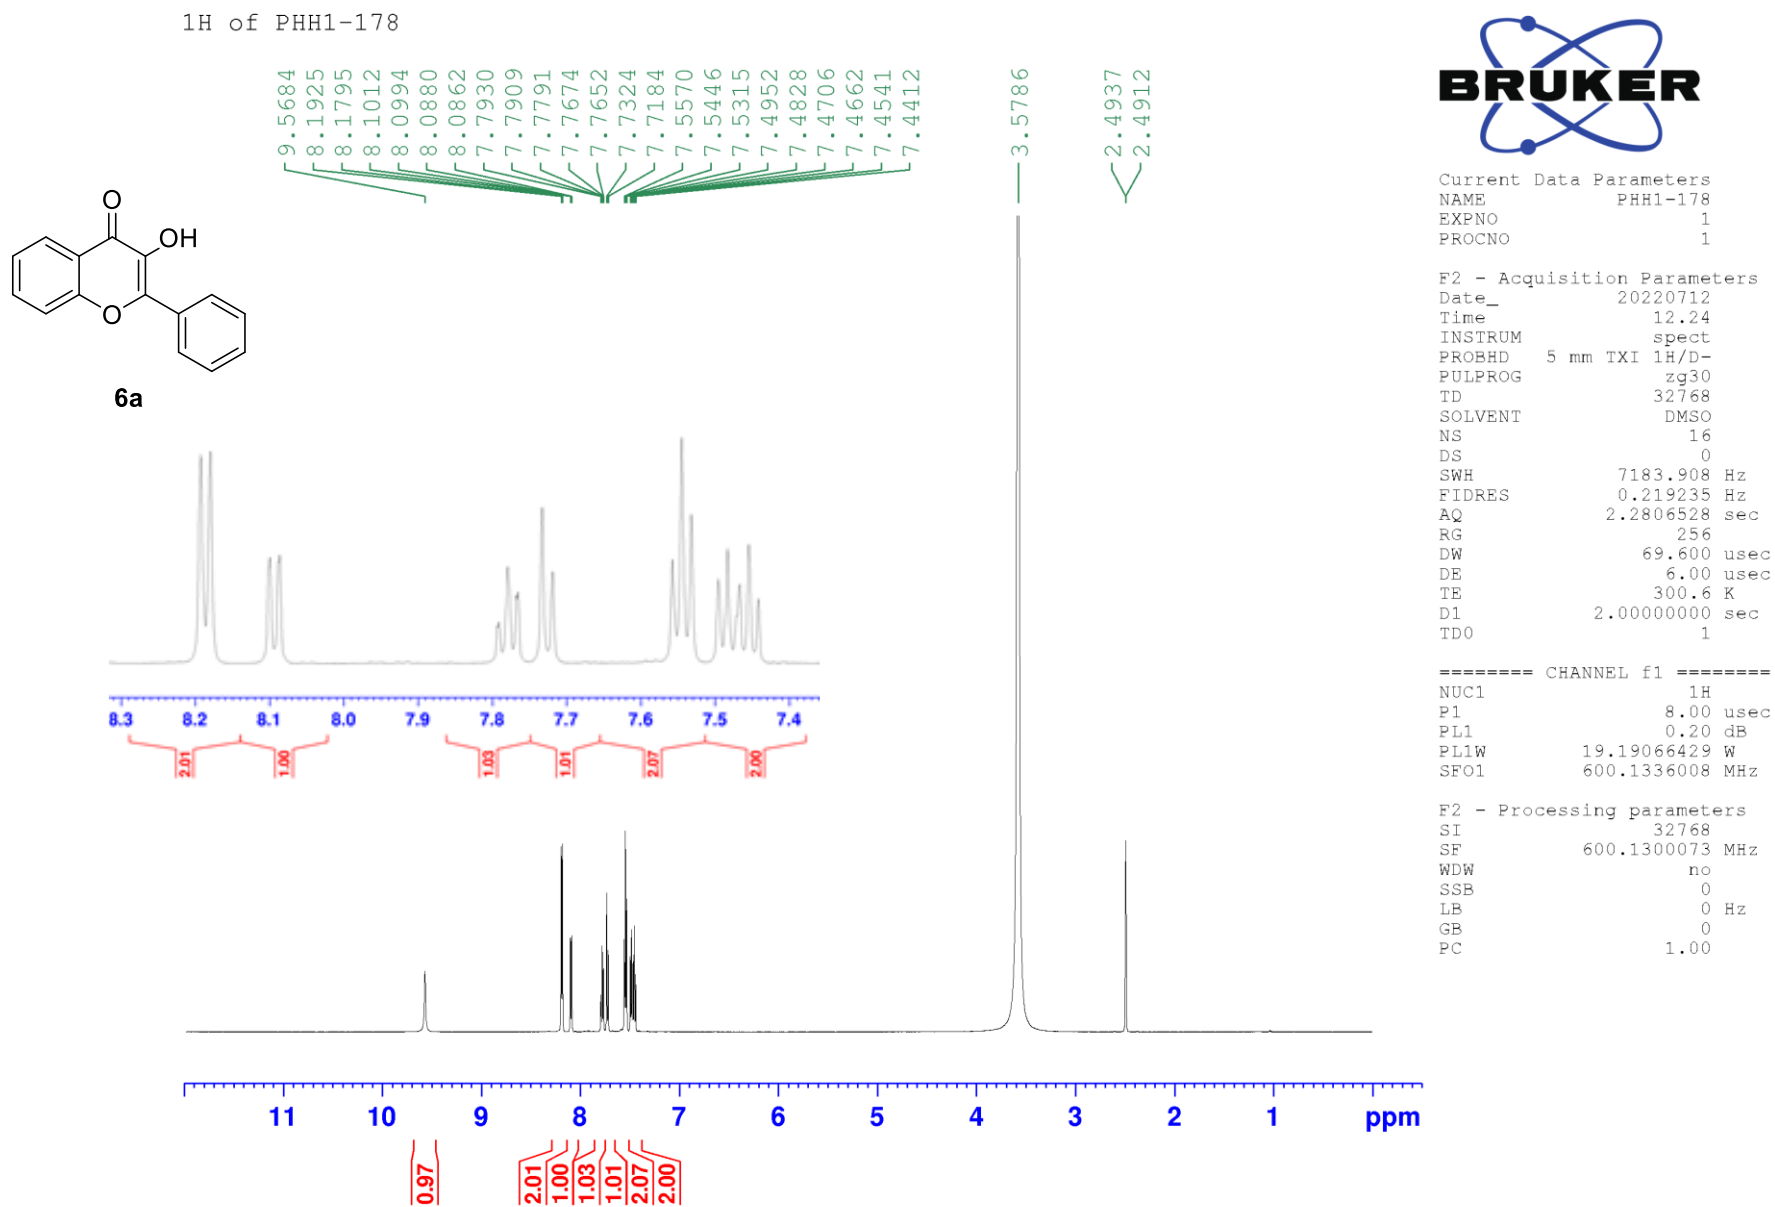

Figure S1. <sup>1</sup>H NMR (600 MHz, DMSO-*d*<sub>6</sub>) for compound **6a**.

13C of PHH1-178

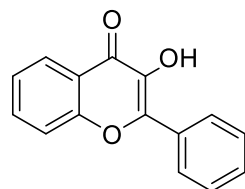

**6a**

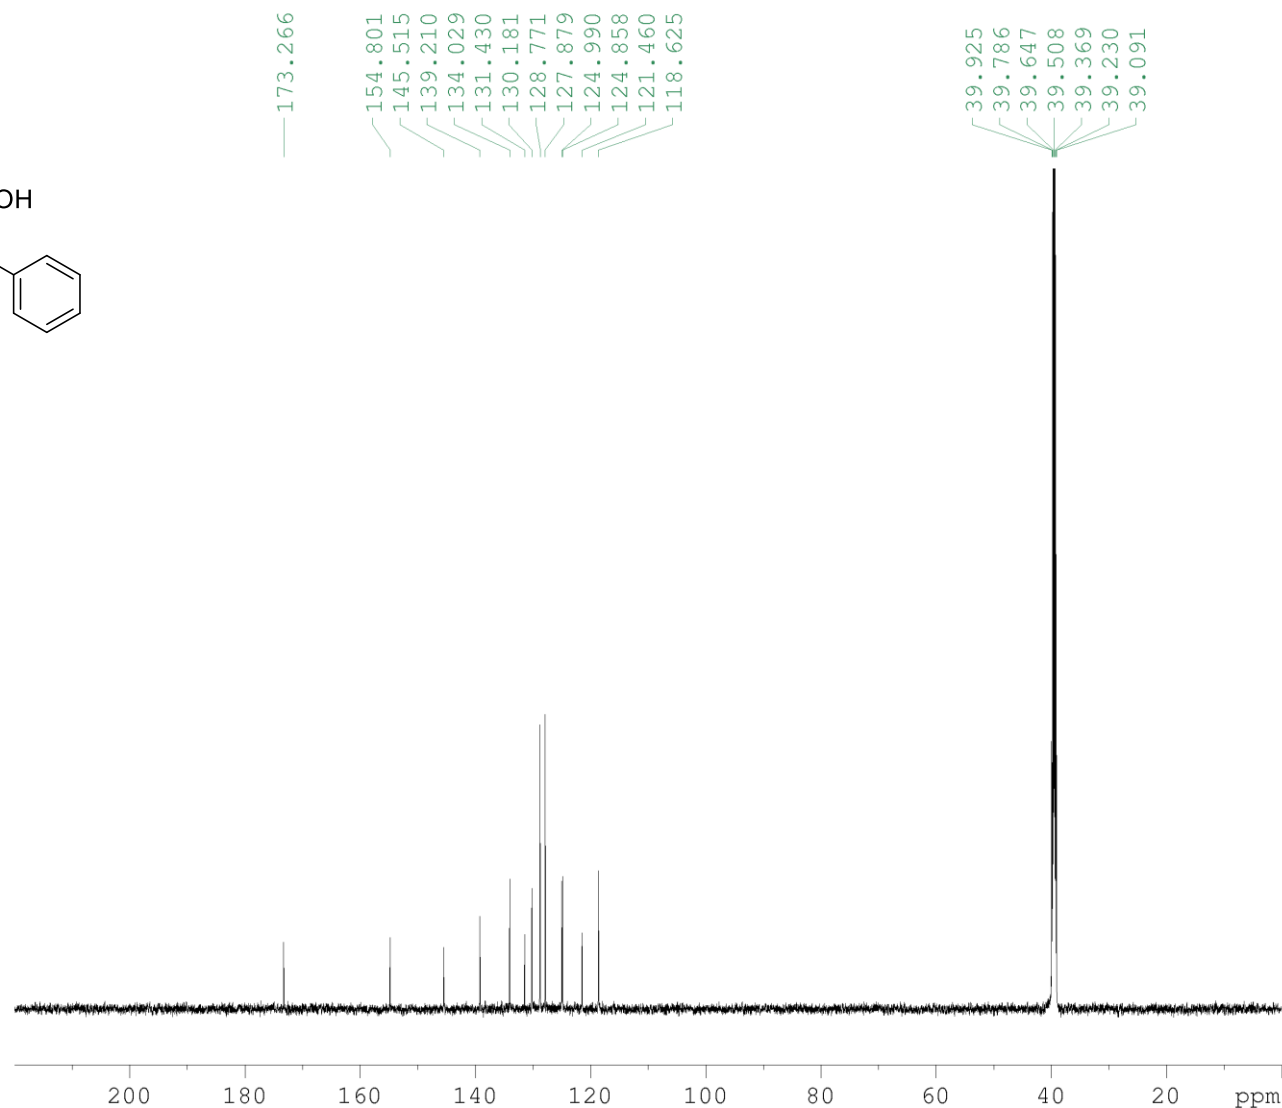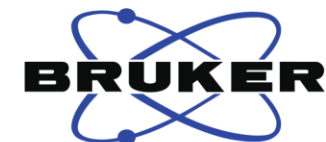

Current Data Parameters  
NAME PHH1-178  
EXPNO 2  
PROCNO 1

F2 - Acquisition Parameters  
Date\_ 20220624  
Time 13.52  
INSTRUM spect  
PROBHD 5 mm PABBO BB-  
PULPROG zgpg30  
TD 65536  
SOLVENT DMSO  
NS 200  
DS 0  
SWH 33333.332 Hz  
FIDRES 0.508626 Hz  
AQ 0.9830400 sec  
RG 46300  
DW 15.000 usec  
DE 6.00 usec  
TE 298.0 K  
D1 2.40000010 sec  
D11 0.03000000 sec  
TD0 1

===== CHANNEL f1 =====  
NUC1 13C  
P1 10.00 usec  
PL1 -1.60 dB  
PL1W 136.15426636 W  
SFO1 150.9194083 MHz

===== CHANNEL f2 =====  
CPDPRG[2] waltz16  
NUC2 1H  
PCPD2 90.00 usec  
PL2 -1.50 dB  
PL12 13.20 dB  
PL13 16.20 dB  
PL2W 28.38507080 W  
PL12W 0.96181160 W  
PL13W 0.48204759 W  
SFO2 600.1339008 MHz

F2 - Processing parameters  
SI 32768  
SF 150.9028448 MHz  
WDW EM  
SSB 0  
LB 3.00 Hz  
GB 0  
PC 1.00

Figure S2.  $^{13}\text{C}$  NMR (150 MHz,  $\text{DMSO-}d_6$ ) for compound **6a**.

<sup>1</sup>H of PHH1-205

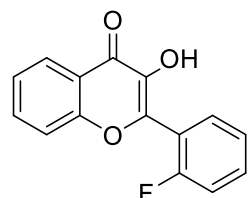

**6b**

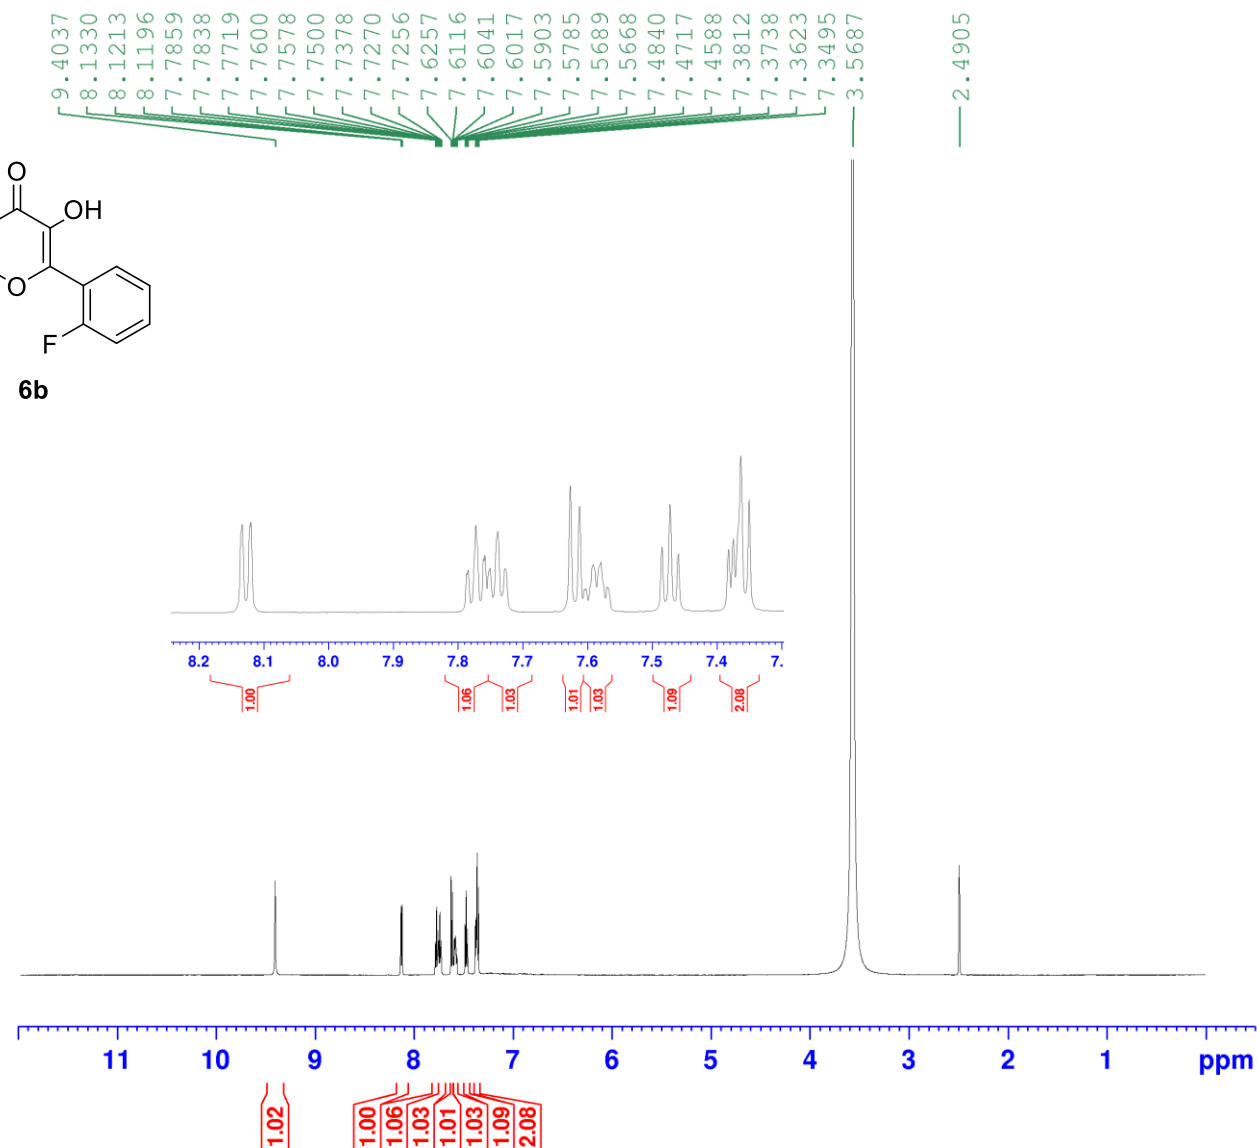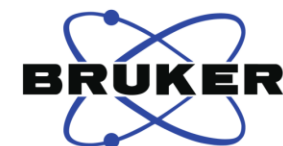

Current Data Parameters  
NAME PHH1-205  
EXPNO 1  
PROCNO 1

F2 - Acquisition Parameters  
Date\_ 20220706  
Time 15.11  
INSTRUM spect  
PROBHD 5 mm TXI 1H/D-  
PULPROG zg30  
TD 32768  
SOLVENT DMSO  
NS 16  
DS 0  
SWH 7183.908 Hz  
FIDRES 0.219235 Hz  
AQ 2.2806528 sec  
RG 161  
DW 69.600 usec  
DE 6.00 usec  
TE 300.9 K  
D1 2.00000000 sec  
TD0 1

===== CHANNEL f1 =====  
NUC1 1H  
P1 8.00 usec  
PL1 0.20 dB  
PL1W 19.19066429 W  
SFO1 600.1336008 MHz

F2 - Processing parameters  
SI 32768  
SF 600.1300073 MHz  
WDW no  
SSB 0  
LB 0 Hz  
GB 0  
PC 1.00

Figure S3. <sup>1</sup>H NMR (600 MHz, DMSO-*d*<sub>6</sub>) for compound **6b**.

13C of PHH1-205

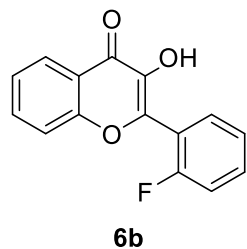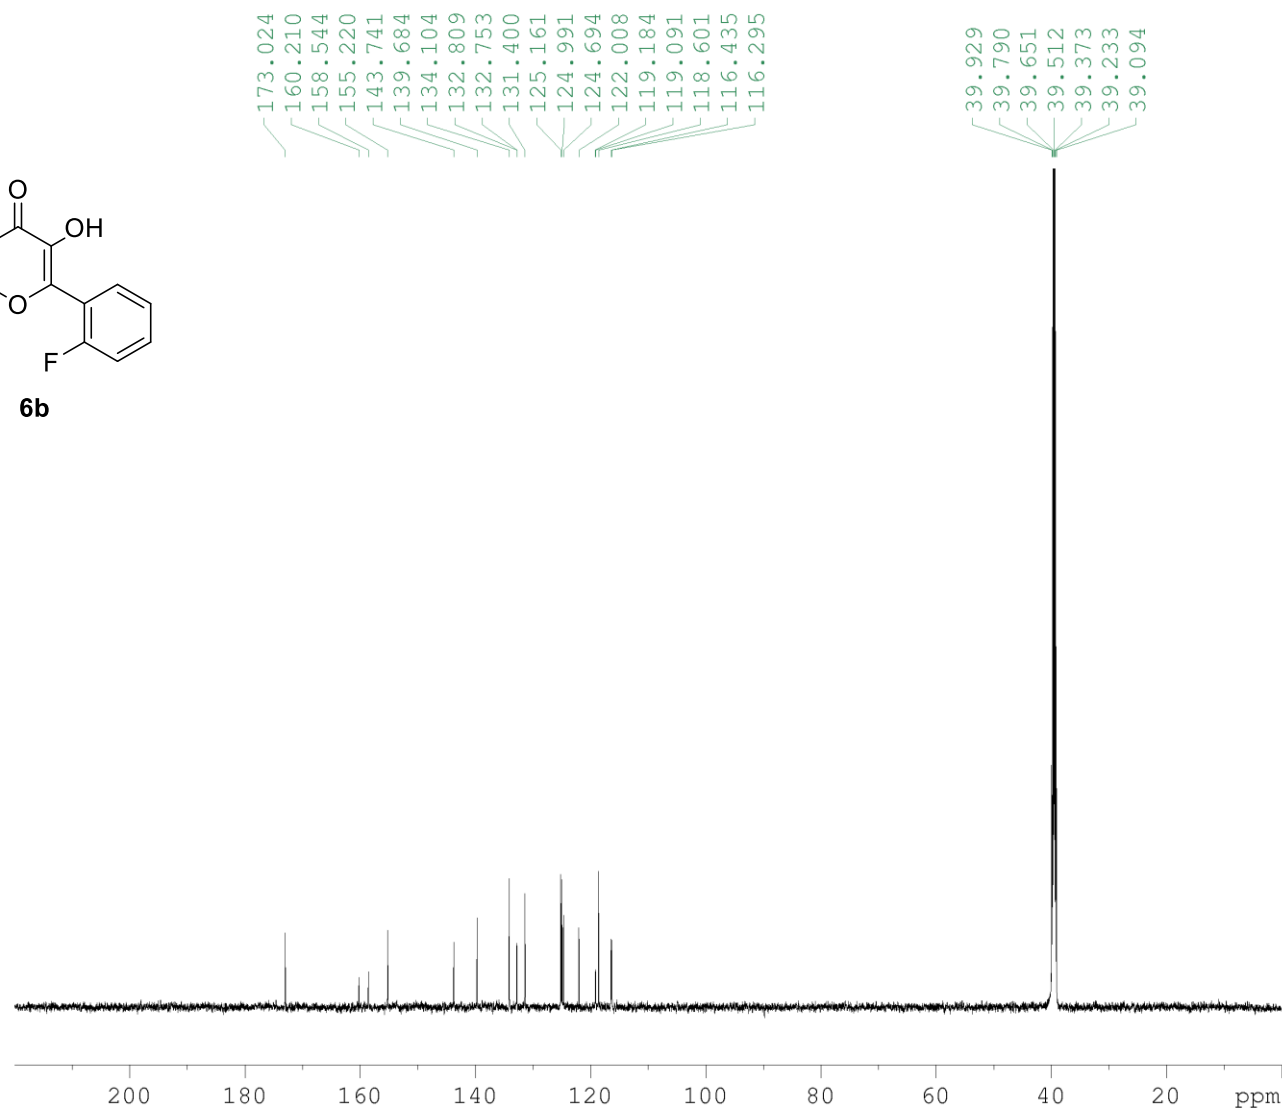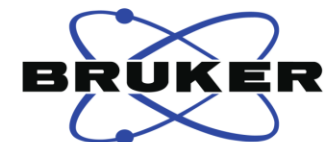

Current Data Parameters  
NAME PHH1-205  
EXPNO 2  
PROCNO 1

F2 - Acquisition Parameters  
Date\_ 20220624  
Time 13.38  
INSTRUM spect  
PROBHD 5 mm PABBO BB-  
PULPROG zgpg30  
TD 65536  
SOLVENT DMSO  
NS 215  
DS 0  
SWH 33333.332 Hz  
FIDRES 0.508626 Hz  
AQ 0.9830400 sec  
RG 46300  
DW 15.000 usec  
DE 6.00 usec  
TE 298.1 K  
D1 2.40000010 sec  
D11 0.03000000 sec  
TD0 1

===== CHANNEL f1 =====  
NUC1 13C  
P1 10.00 usec  
PL1 -1.60 dB  
PL1W 136.15426636 W  
SFO1 150.9194083 MHz

===== CHANNEL f2 =====  
CPDPRG[2] waltz16  
NUC2 1H  
PCPD2 90.00 usec  
PL2 -1.50 dB  
PL12 13.20 dB  
PL13 16.20 dB  
PL2W 28.38507080 W  
PL12W 0.96181160 W  
PL13W 0.48204759 W  
SFO2 600.1339008 MHz

F2 - Processing parameters  
SI 32768  
SF 150.9028448 MHz  
WDW EM  
SSB 0  
LB 3.00 Hz  
GB 0  
PC 1.00

Figure S4.  $^{13}\text{C}$  NMR (150 MHz,  $\text{DMSO-}d_6$ ) for compound **6b**.

<sup>1</sup>H of PHH1-209

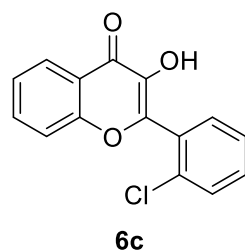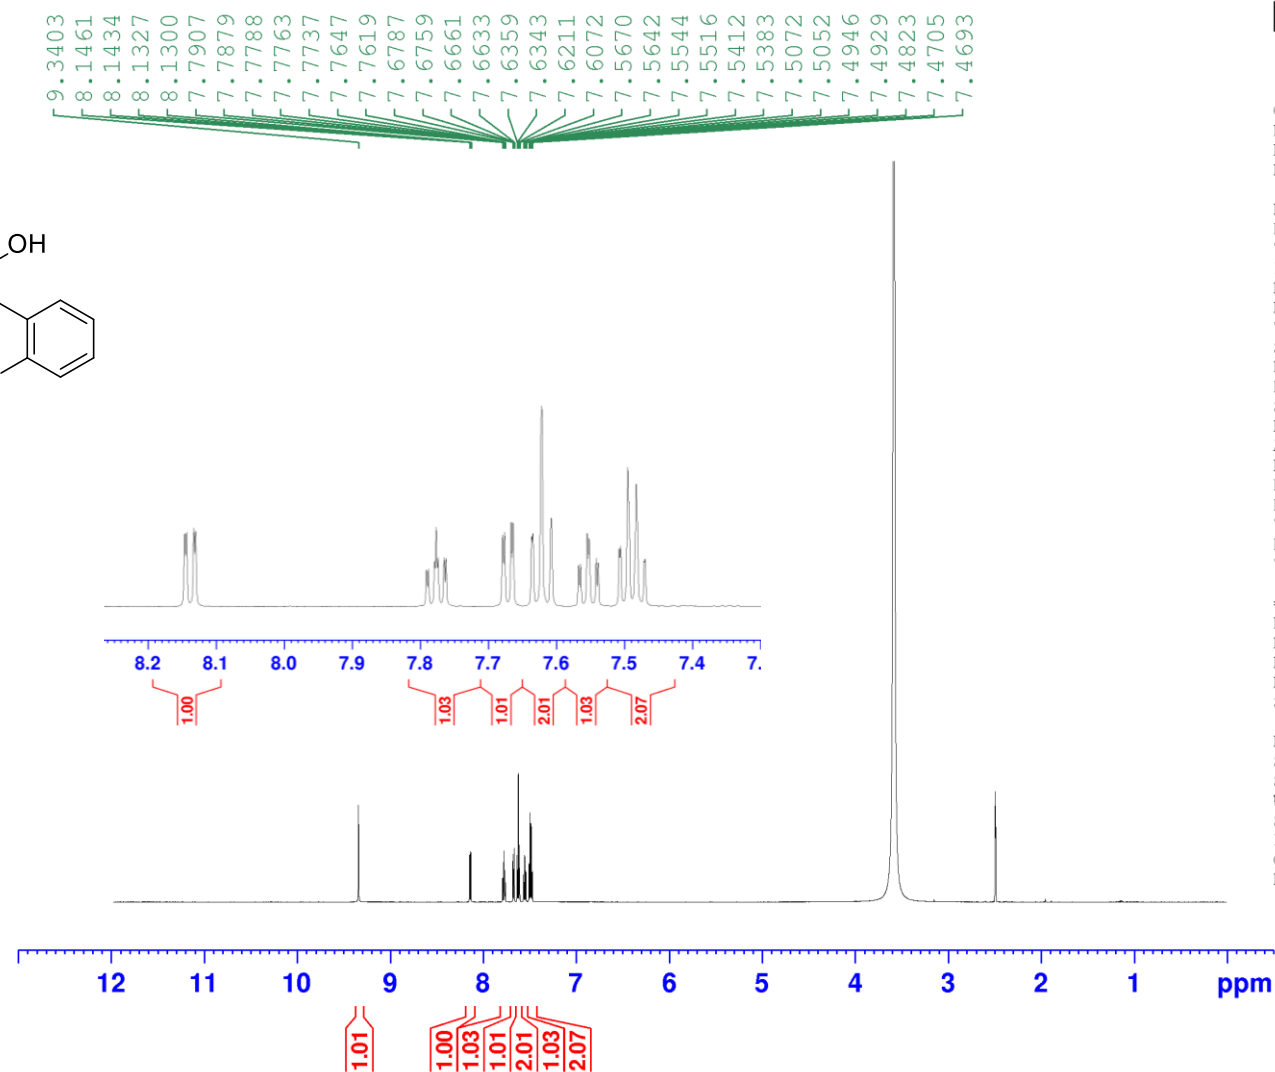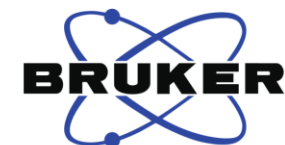

Current Data Parameters  
NAME PHH1-209  
EXPNO 1  
PROCNO 1

F2 - Acquisition Parameters  
Date\_ 20221012  
Time 8.14  
INSTRUM spect  
PROBHD 5 mm TXI 1H/D-  
PULPROG zg30  
TD 32768  
SOLVENT DMSO  
NS 16  
DS 0  
SWH 7183.908 Hz  
FIDRES 0.219235 Hz  
AQ 2.2806528 sec  
RG 114  
DW 69.600 usec  
DE 6.00 usec  
TE 300.0 K  
D1 2.00000000 sec  
TD0 1

===== CHANNEL f1 =====  
NUC1 1H  
P1 8.00 usec  
PL1 0.20 dB  
PL1W 19.19066429 W  
SFO1 600.1336008 MHz

F2 - Processing parameters  
SI 32768  
SF 600.1300073 MHz  
WDW no  
SSB 0  
LB 0 Hz  
GB 0  
PC 1.00

Figure S5. <sup>1</sup>H NMR (600 MHz, DMSO-*d*<sub>6</sub>) for compound **6c**.



13C of PHH1-209

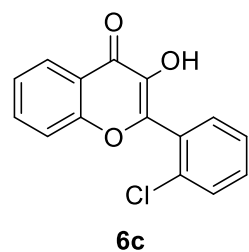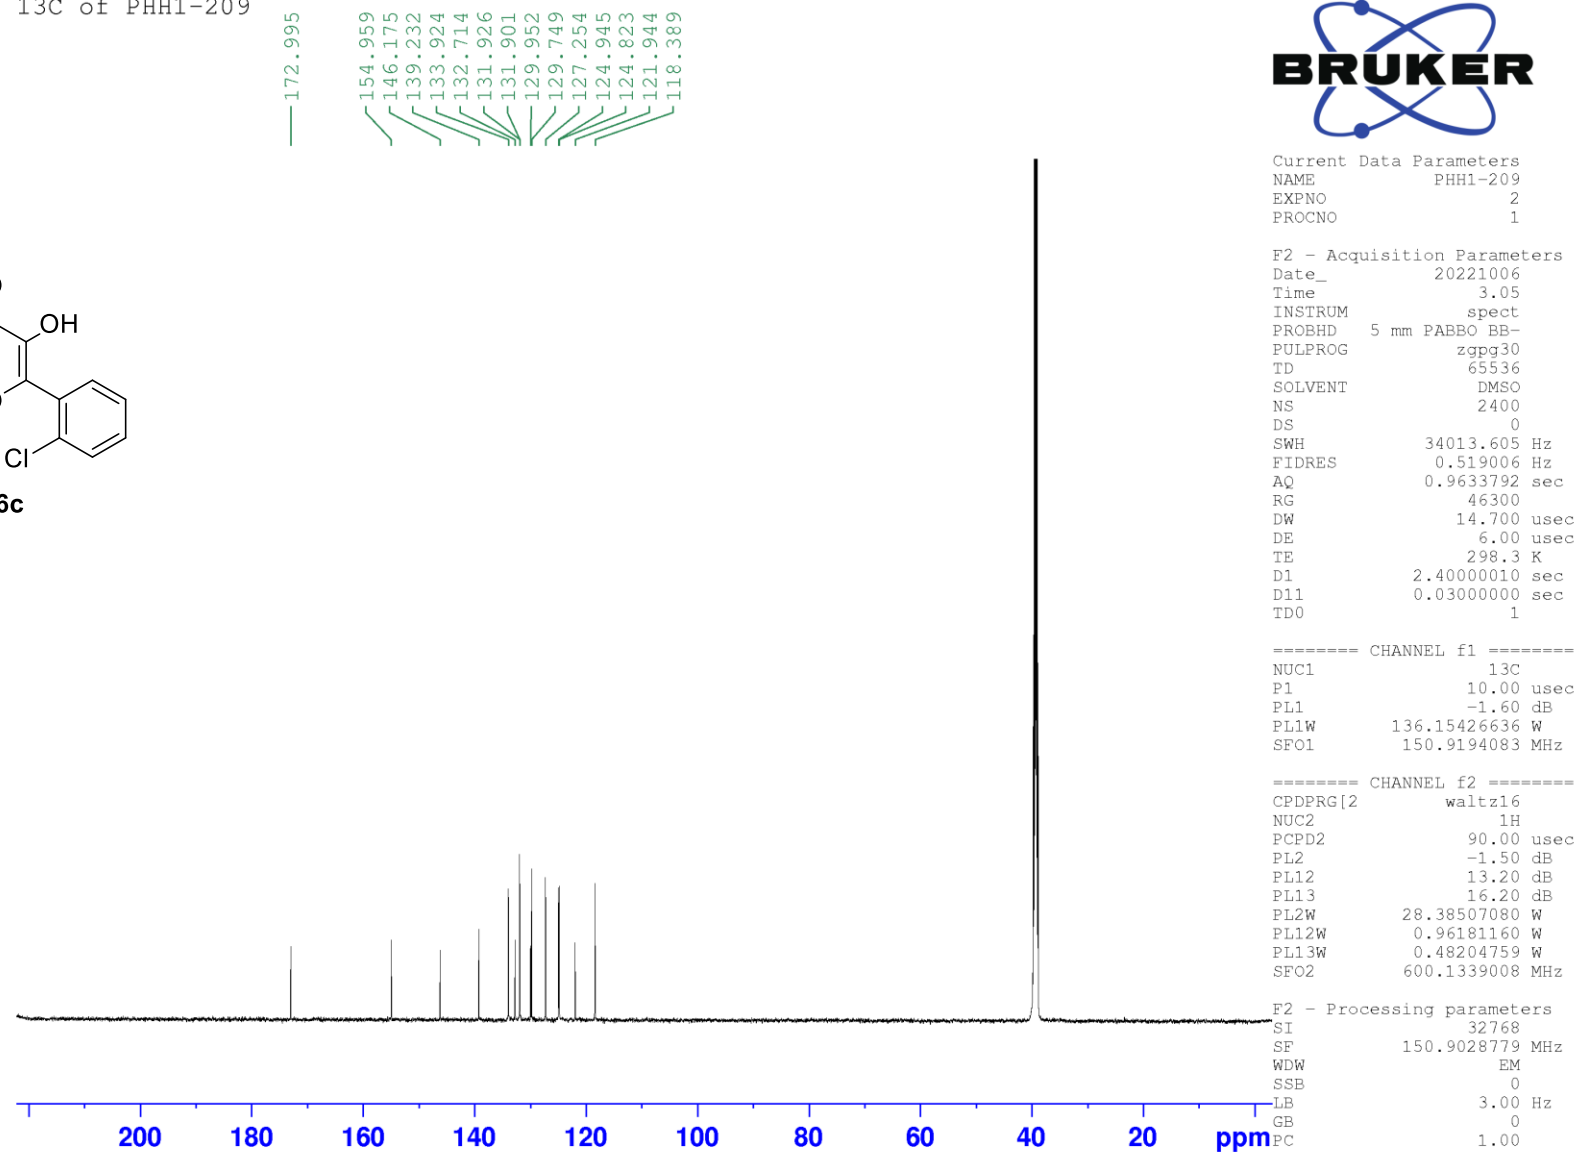

Figure S6.  $^{13}\text{C}$  NMR (150 MHz,  $\text{DMSO}-d_6$ ) for compound **6c**.

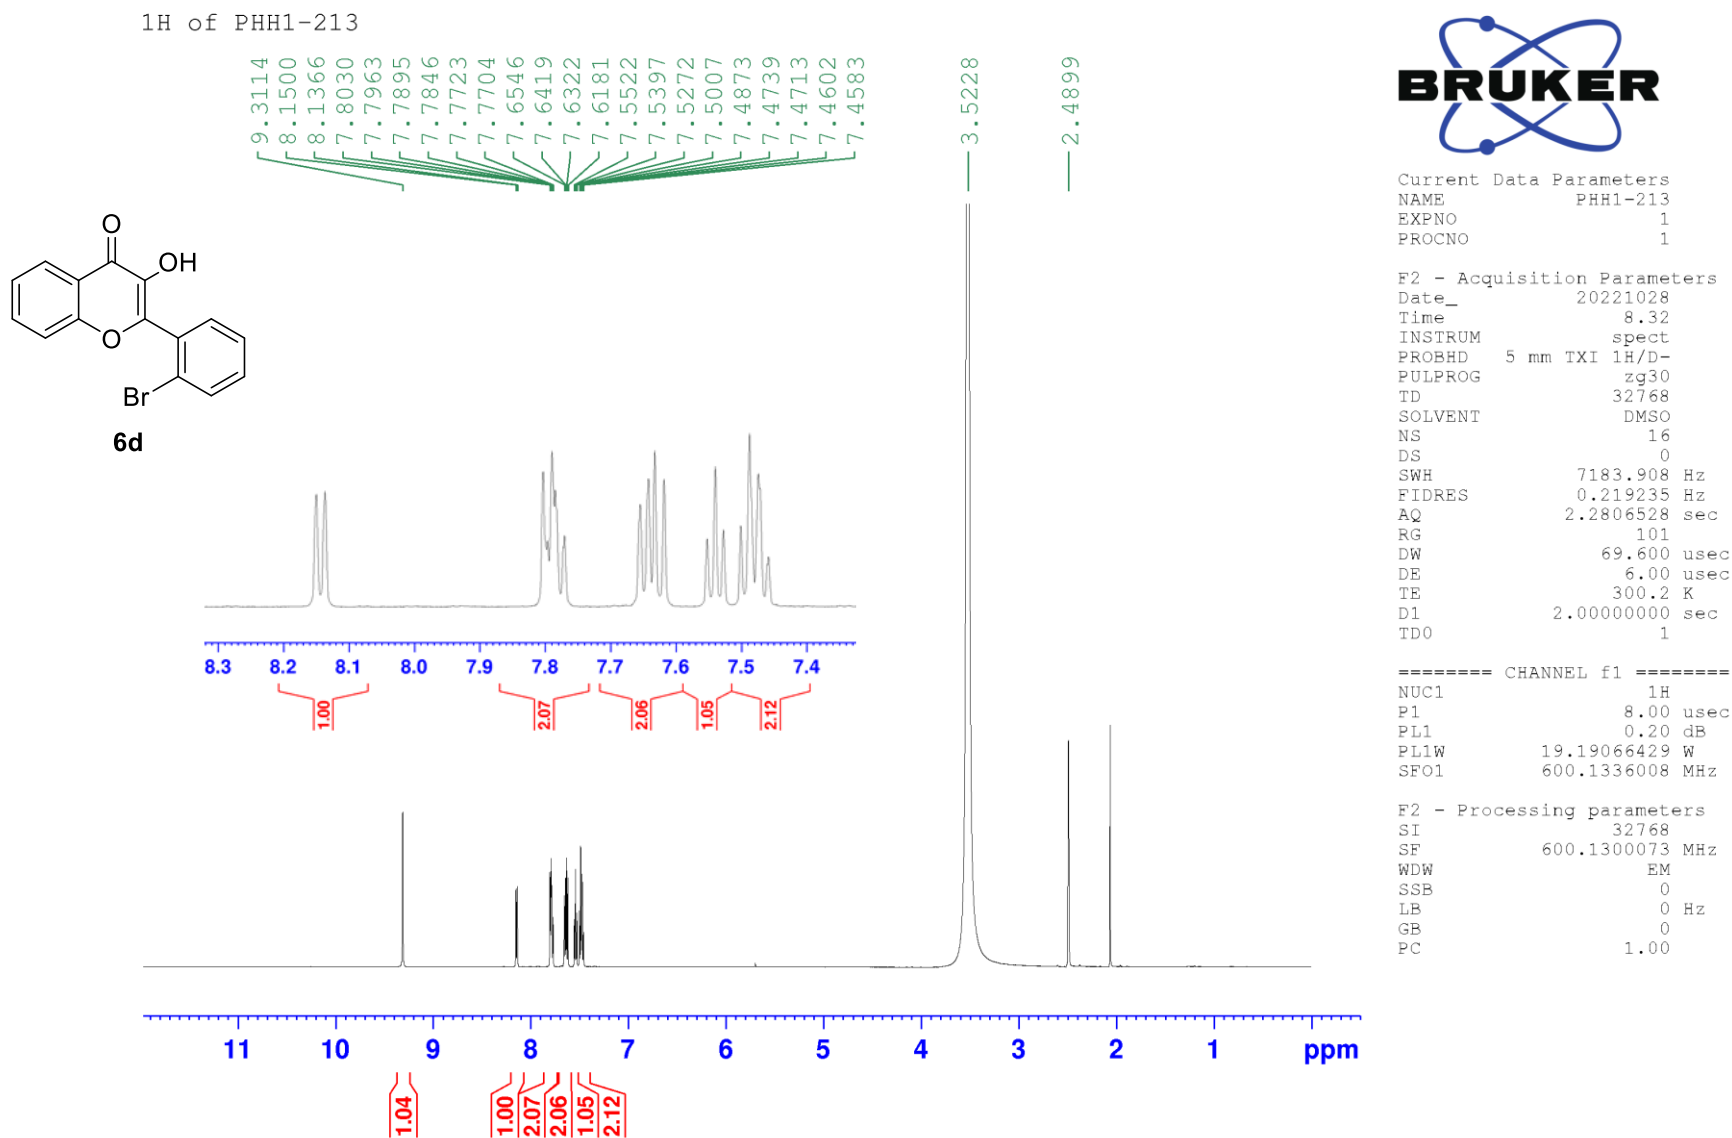

Figure S7.  $^1\text{H}$  NMR (600 MHz,  $\text{DMSO-}d_6$ ) for compound **6d**.

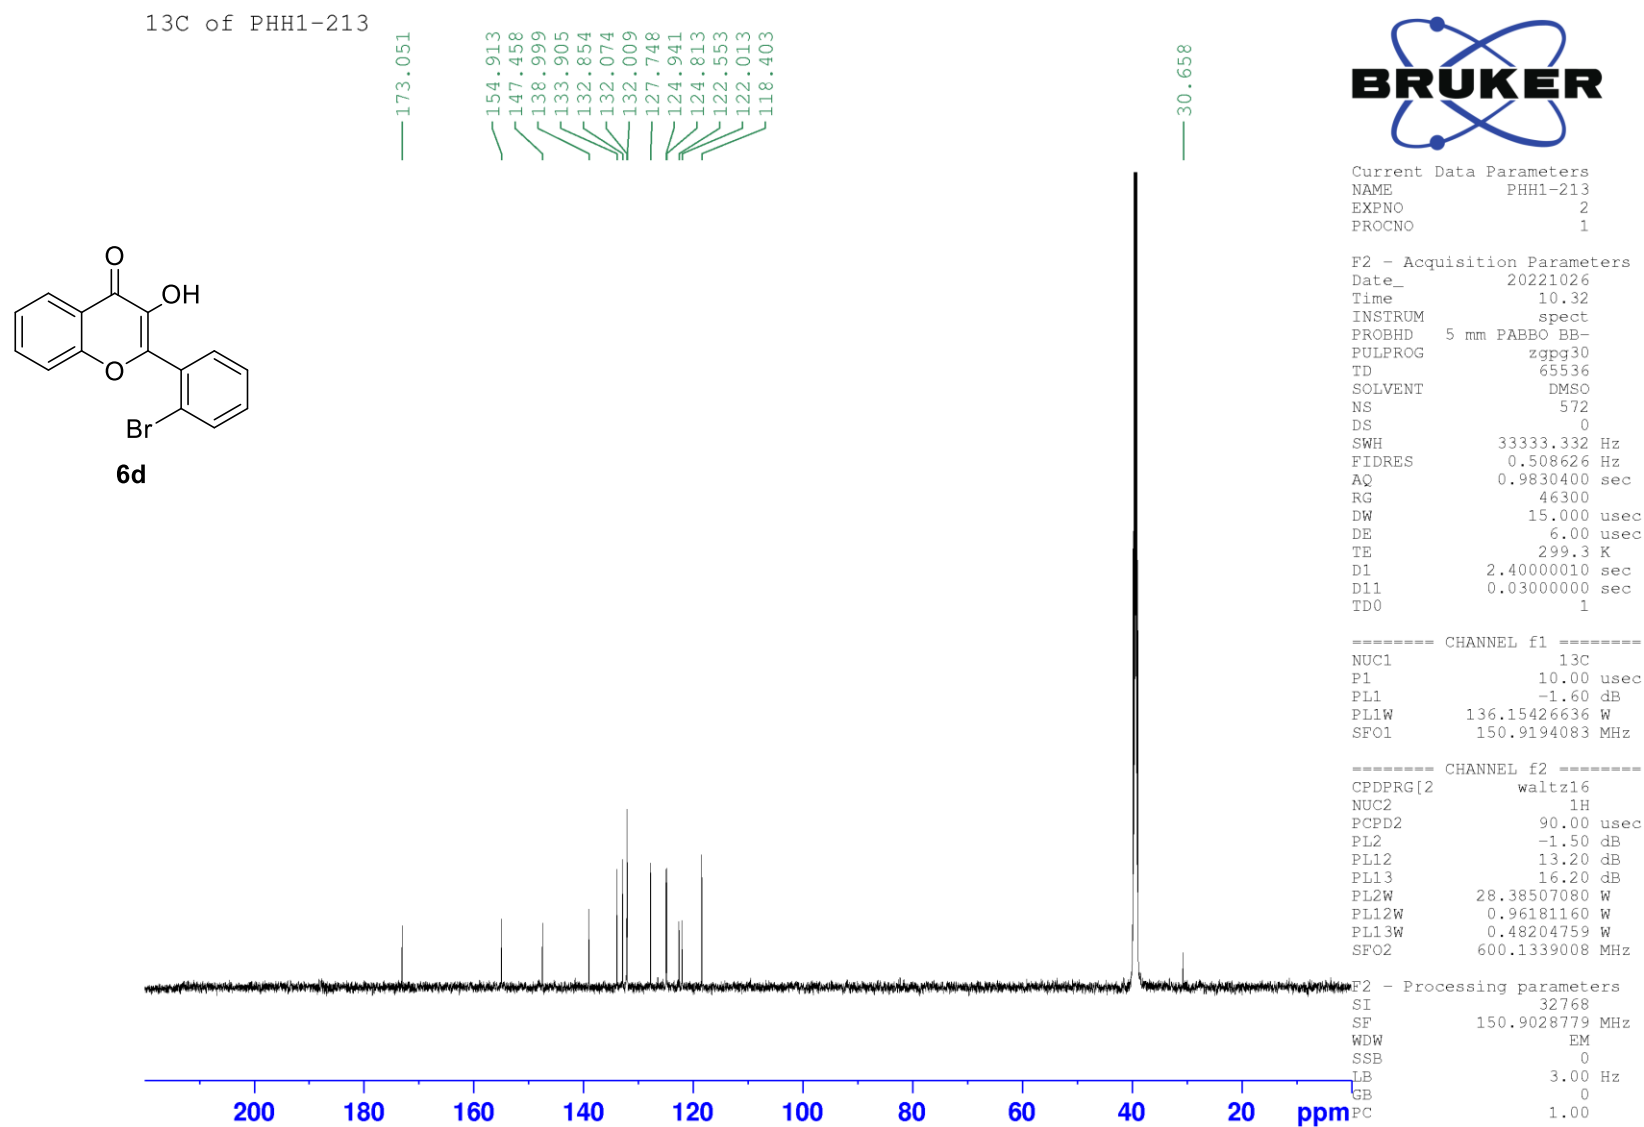

Figure S8.  $^{13}\text{C}$  NMR (150 MHz,  $\text{DMSO-}d_6$ ) for compound **6d**.

<sup>1</sup>H of PHH1-217

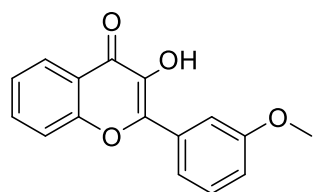

**6e**

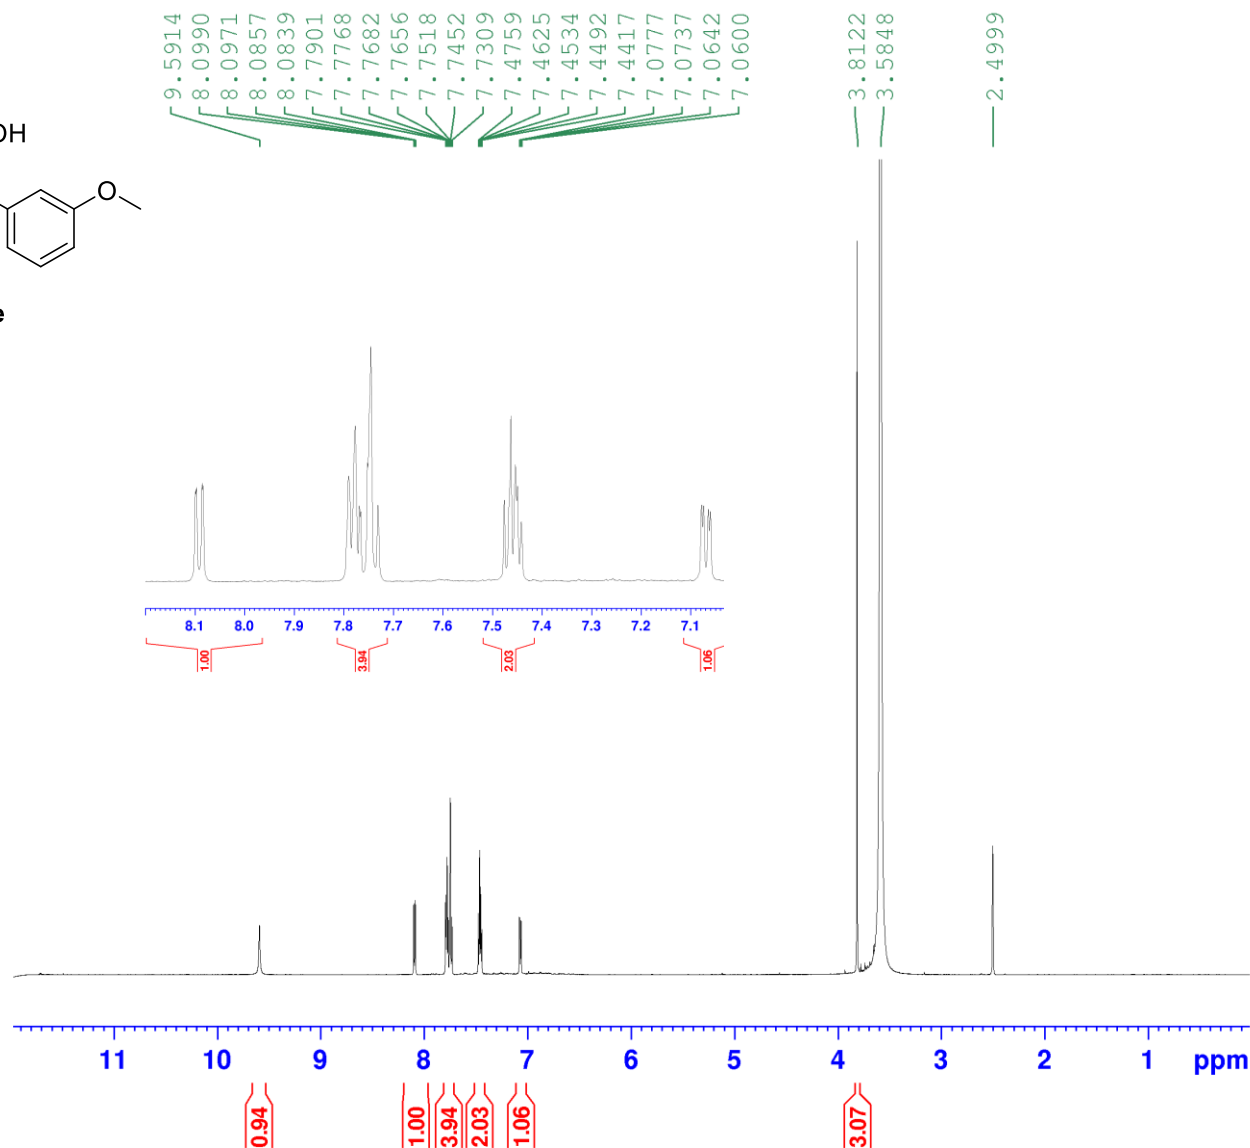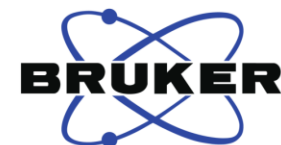

Current Data Parameters  
NAME PHH1-217  
EXPNO 1  
PROCNO 1

F2 - Acquisition Parameters  
Date\_ 20220825  
Time 15.36  
INSTRUM spect  
PROBHD 5 mm TXI 1H/D-  
PULPROG zg30  
TD 32768  
SOLVENT DMSO  
NS 16  
DS 0  
SWH 7183.908 Hz  
FIDRES 0.219235 Hz  
AQ 2.2806528 sec  
RG 724  
DW 69.600 usec  
DE 6.00 usec  
TE 301.4 K  
D1 2.00000000 sec  
TD0 1

===== CHANNEL f1 =====  
NUC1 1H  
P1 8.00 usec  
PL1 0.20 dB  
PL1W 19.19066429 W  
SFO1 600.1336008 MHz

F2 - Processing parameters  
SI 32768  
SF 600.1300015 MHz  
WDW no  
SSB 0  
LB 0 Hz  
GB 0  
PC 1.00

Figure S9. <sup>1</sup>H NMR (600 MHz, DMSO-*d*<sub>6</sub>) for compound **6e**.

13C of PHH1-217

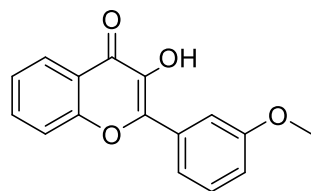

**6e**

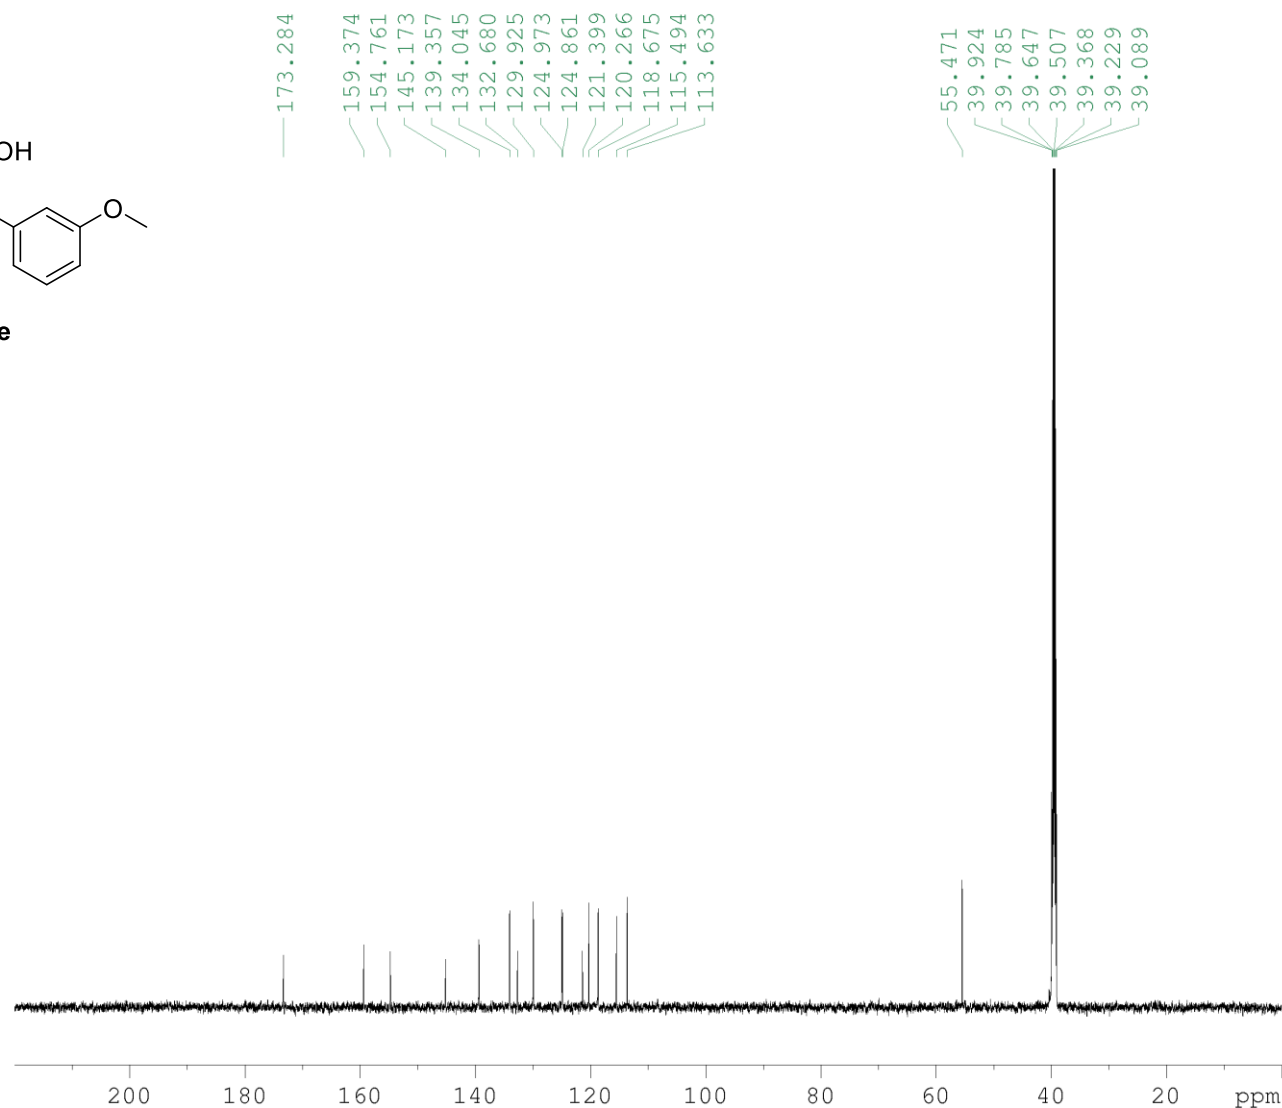

Current Data Parameters  
NAME PHH1-217  
EXPNO 2  
PROCNO 1

F2 - Acquisition Parameters  
Date\_ 20220817  
Time 14.05  
INSTRUM spect  
PROBHD 5 mm PABBO BB-  
PULPROG zgpg30  
TD 65536  
SOLVENT DMSO  
NS 152  
DS 0  
SWH 33333.332 Hz  
FIDRES 0.508626 Hz  
AQ 0.9830400 sec  
RG 46300  
DW 15.000 usec  
DE 6.00 usec  
TE 298.3 K  
D1 2.40000010 sec  
D11 0.03000000 sec  
TD0 1

===== CHANNEL f1 =====  
NUC1 13C  
P1 10.00 usec  
PL1 -1.60 dB  
PL1W 136.15426636 W  
SFO1 150.9194083 MHz

===== CHANNEL f2 =====  
CPDPRG[2] waltz16  
NUC2 1H  
PCPD2 90.00 usec  
PL2 -1.50 dB  
PL12 13.20 dB  
PL13 16.20 dB  
PL2W 28.38507080 W  
PL12W 0.96181160 W  
PL13W 0.48204759 W  
SFO2 600.1339008 MHz

F2 - Processing parameters  
SI 32768  
SF 150.9028423 MHz  
WDW EM  
SSB 0  
LB 3.00 Hz  
GB 0  
PC 1.00

Figure S10.  $^{13}\text{C}$  NMR (150 MHz,  $\text{DMSO}-d_6$ ) for compound **6e**.  
S13

<sup>1</sup>H of PHH1-204

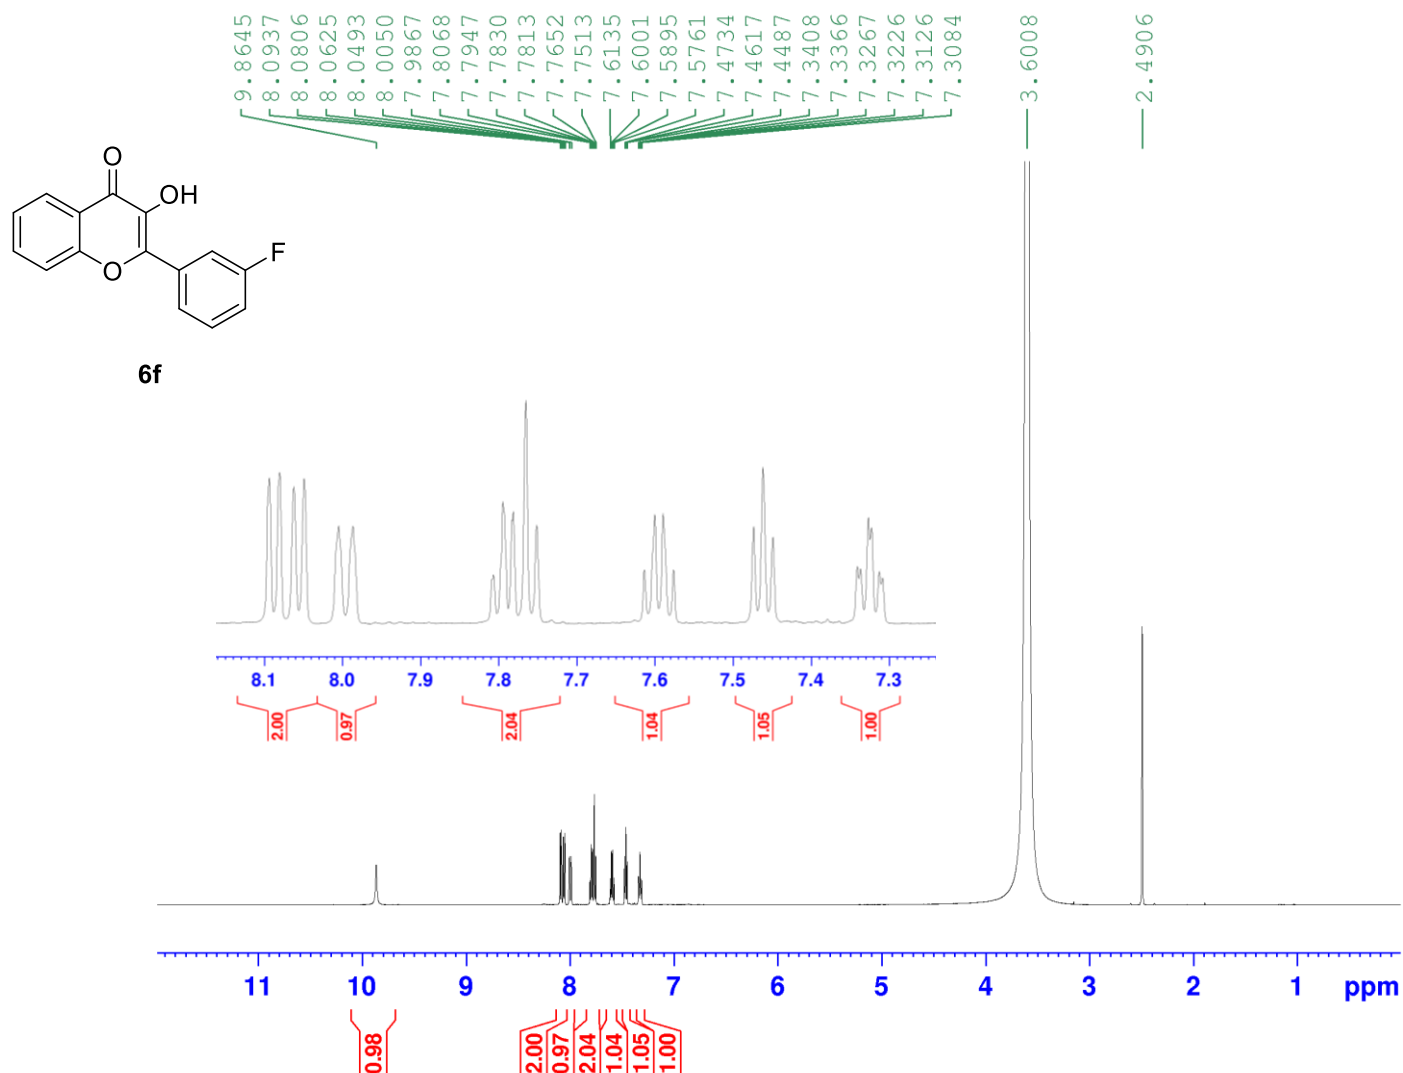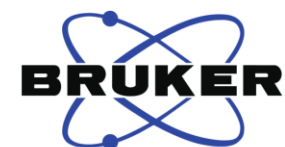

Current Data Parameters  
NAME PHH1-204  
EXPNO 1  
PROCNO 1

F2 - Acquisition Parameters  
Date\_ 20221017  
Time 9.21  
INSTRUM spect  
PROBHD 5 mm TXI 1H/D-  
PULPROG zg30  
TD 32768  
SOLVENT DMSO  
NS 16  
DS 0  
SWH 7183.908 Hz  
FIDRES 0.219235 Hz  
AQ 2.2806528 sec  
RG 114  
DW 69.600 usec  
DE 6.00 usec  
TE 300.0 K  
D1 2.00000000 sec  
TD0 1

===== CHANNEL f1 =====  
NUC1 1H  
P1 8.00 usec  
PL1 0.20 dB  
PL1W 19.19066429 W  
SFO1 600.1336008 MHz

F2 - Processing parameters  
SI 32768  
SF 600.1300073 MHz  
WDW EM  
SSB 0  
LB 0 Hz  
GB 0  
PC 1.00

Figure S11. <sup>1</sup>H NMR (600 MHz, DMSO-*d*<sub>6</sub>) for compound **6f**.

13C of PHH1-204

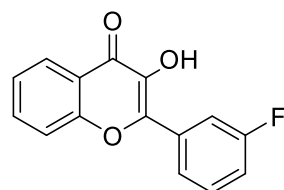

**6f**

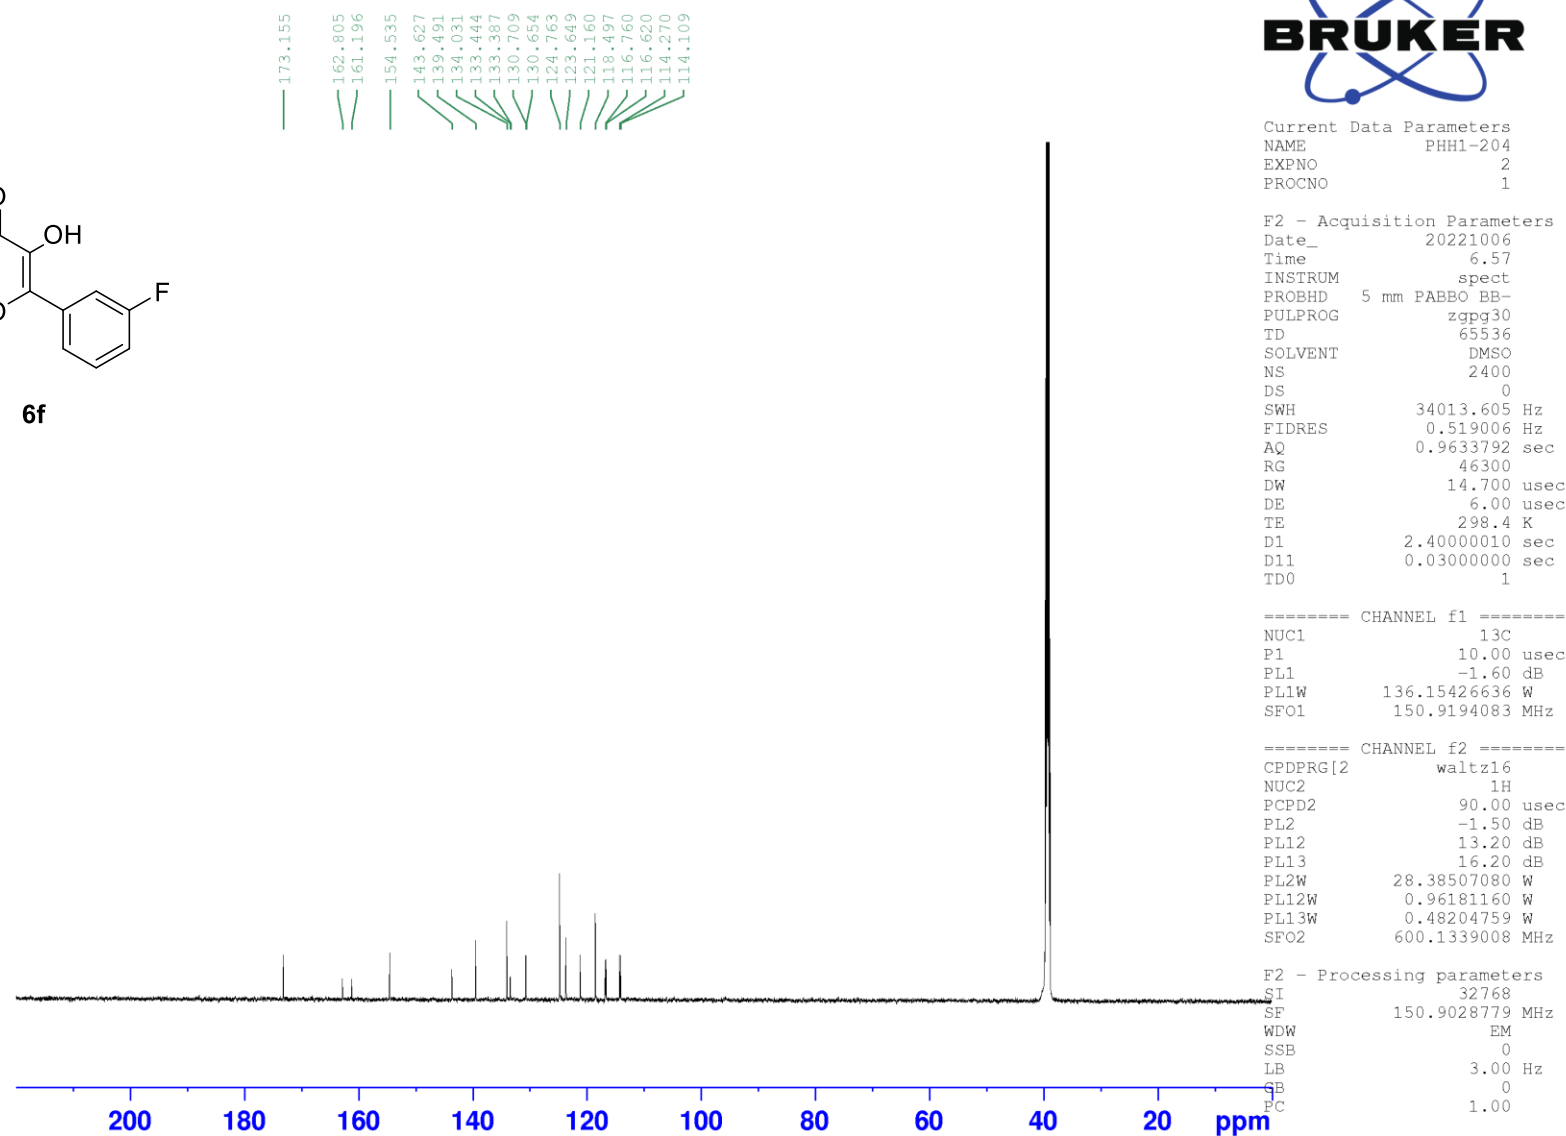

Figure S12.  $^{13}\text{C}$  NMR (150 MHz,  $\text{DMSO}-d_6$ ) for compound **6f**.

1H of PHH1-212

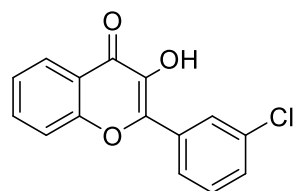

**6g**

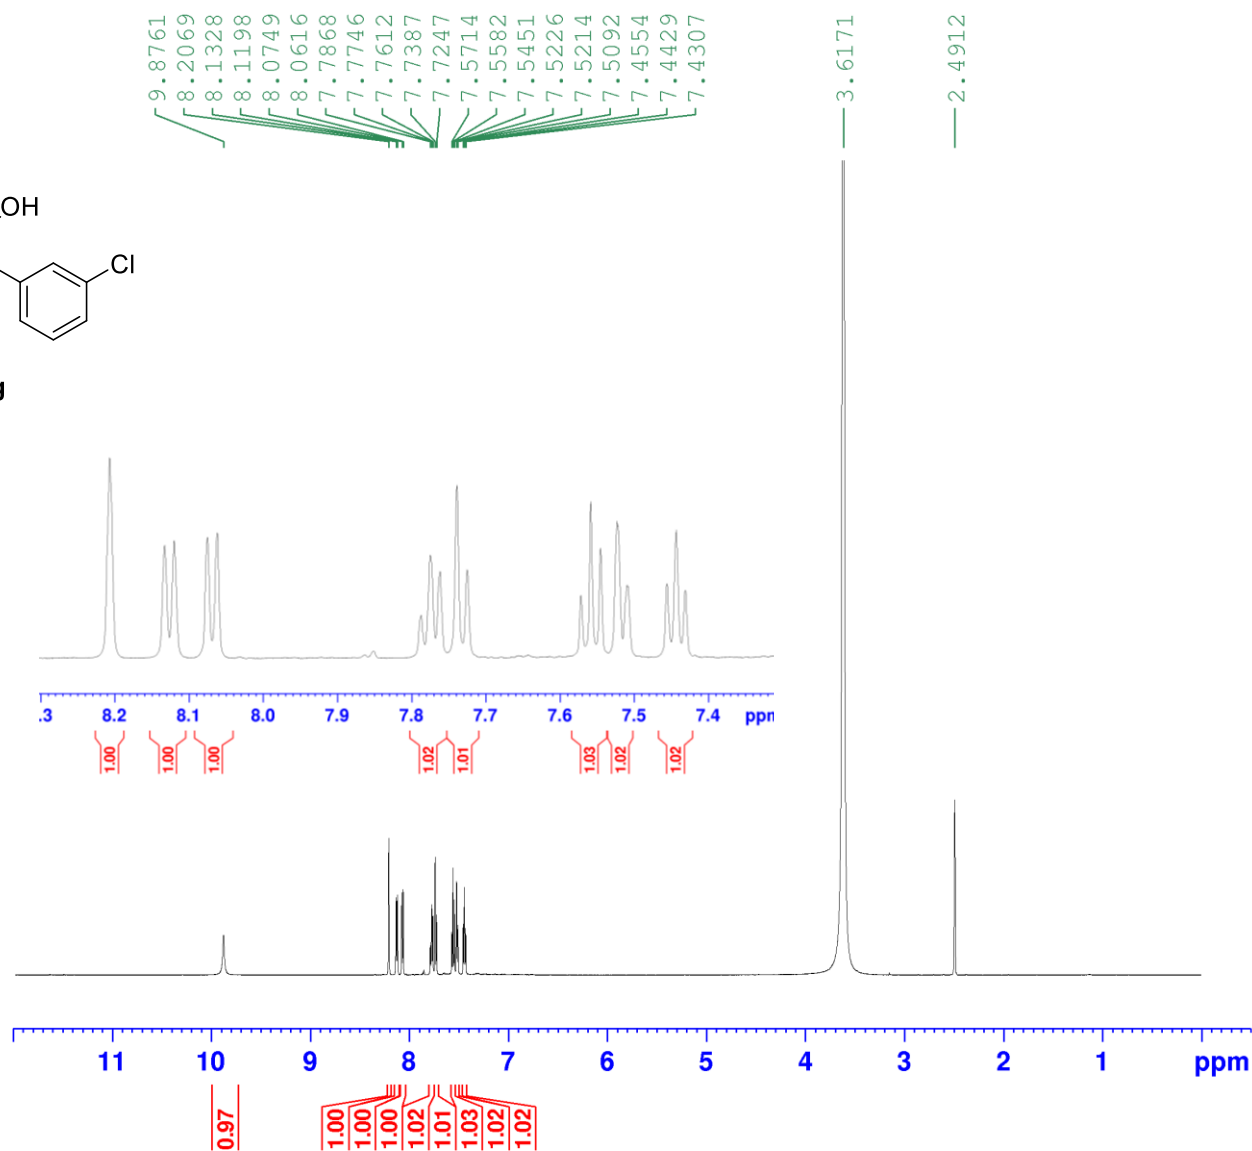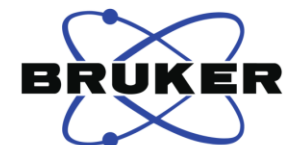

Current Data Parameters  
NAME PHH1-212  
EXPNO 1  
PROCNO 1

F2 - Acquisition Parameters  
Date\_ 20220802  
Time 15.02  
INSTRUM spect  
PROBHD 5 mm TXI 1H/D-  
PULPROG zg30  
TD 32768  
SOLVENT DMSO  
NS 16  
DS 0  
SWH 7183.908 Hz  
FIDRES 0.219235 Hz  
AQ 2.2806528 sec  
RG 724  
DW 69.600 usec  
DE 6.00 usec  
TE 300.0 K  
D1 2.00000000 sec  
TD0 1

===== CHANNEL f1 =====  
NUC1 1H  
P1 8.00 usec  
PL1 0.20 dB  
PL1W 19.19066429 W  
SFO1 600.1336008 MHz

F2 - Processing parameters  
SI 32768  
SF 600.1300073 MHz  
WDW EM  
SSB 0  
LB 0 Hz  
GB 0  
PC 1.00

Figure S13. <sup>1</sup>H NMR (600 MHz, DMSO-*d*<sub>6</sub>) for compound **6g**.



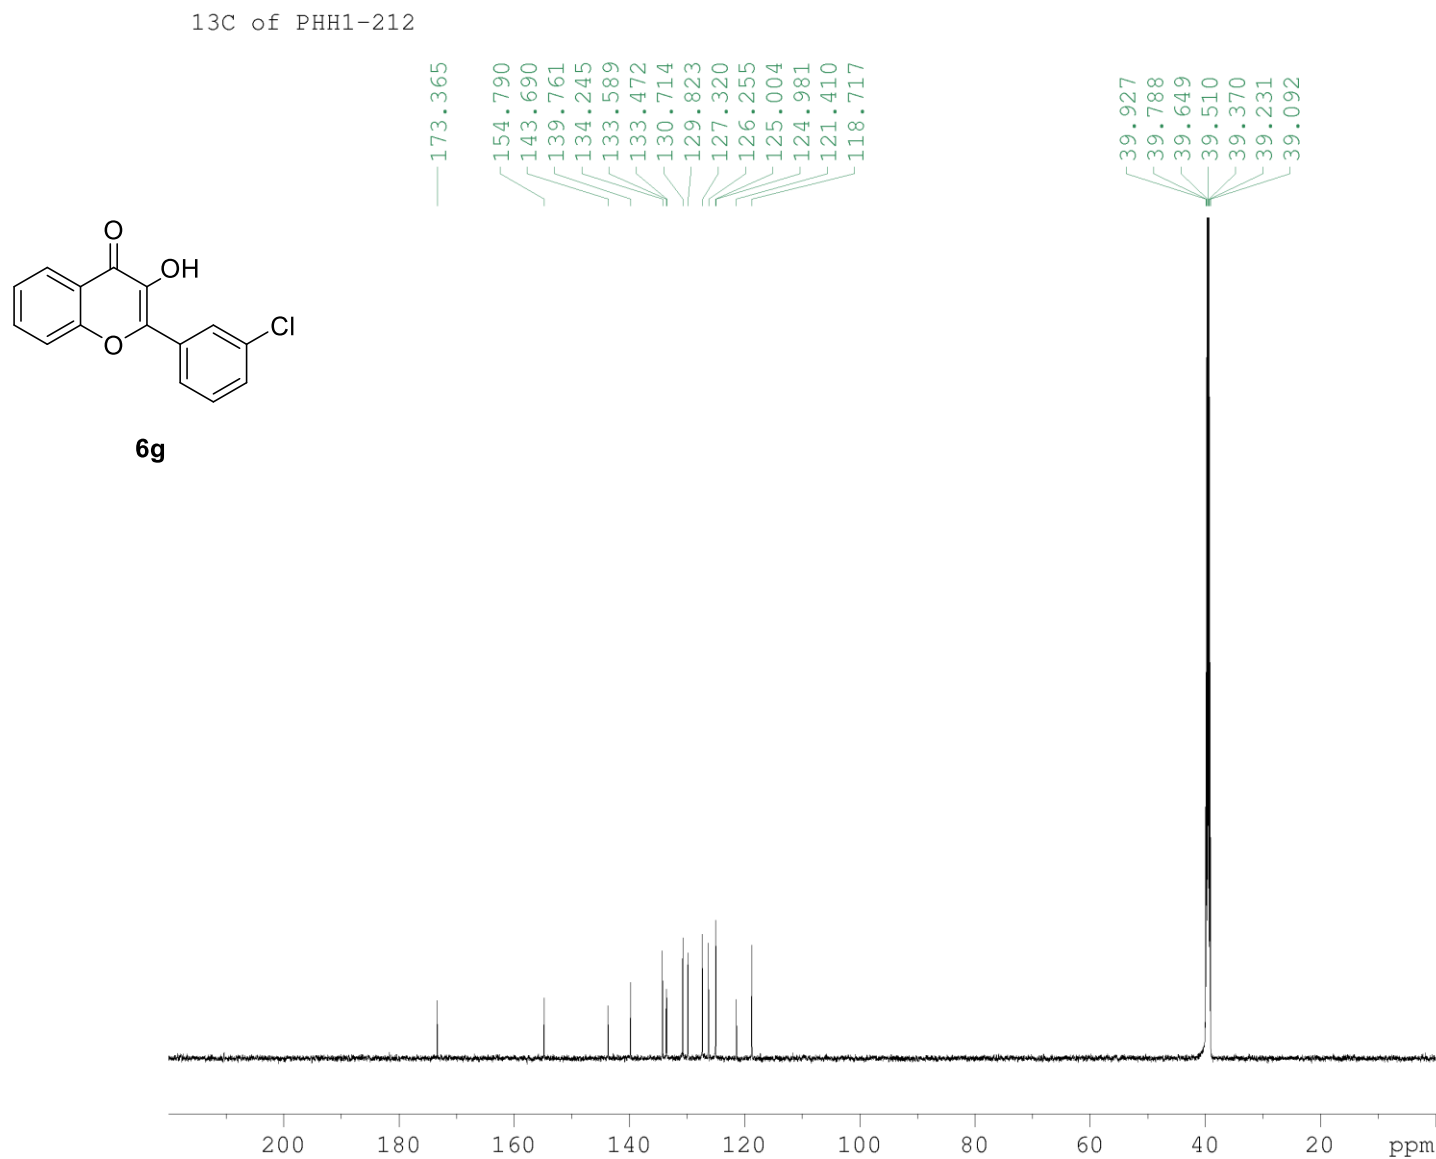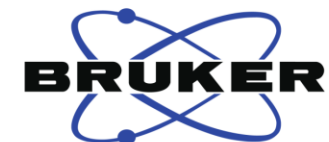

Current Data Parameters  
NAME PHH1-212  
EXPNO 2  
PROCNO 1

F2 - Acquisition Parameters  
Date\_ 20220725  
Time 11.17  
INSTRUM spect  
PROBHD 5 mm PABBO BB-  
PULPROG zgpg30  
TD 65536  
SOLVENT DMSO  
NS 460  
DS 0  
SWH 36231.883 Hz  
FIDRES 0.552855 Hz  
AQ 0.9043968 sec  
RG 46300  
DW 13.800 usec  
DE 6.00 usec  
TE 299.9 K  
D1 2.40000010 sec  
D11 0.03000000 sec  
TD0 1

===== CHANNEL f1 =====  
NUC1 13C  
P1 10.00 usec  
PL1 -1.60 dB  
PL1W 136.15426636 W  
SFO1 150.9194083 MHz

===== CHANNEL f2 =====  
CPDPRG[2] waltz16  
NUC2 1H  
PCPD2 90.00 usec  
PL2 -1.50 dB  
PL12 13.20 dB  
PL13 16.20 dB  
PL2W 28.38507080 W  
PL12W 0.96181160 W  
PL13W 0.48204759 W  
SFO2 600.1339008 MHz

F2 - Processing parameters  
SI 32768  
SF 150.9028398 MHz  
WDW EM  
SSB 0  
LB 3.00 Hz  
GB 0  
PC 1.00

Figure S14. <sup>13</sup>C NMR (150 MHz, DMSO-*d*<sub>6</sub>) for compound **6g**.

<sup>1</sup>H of PHH1-236

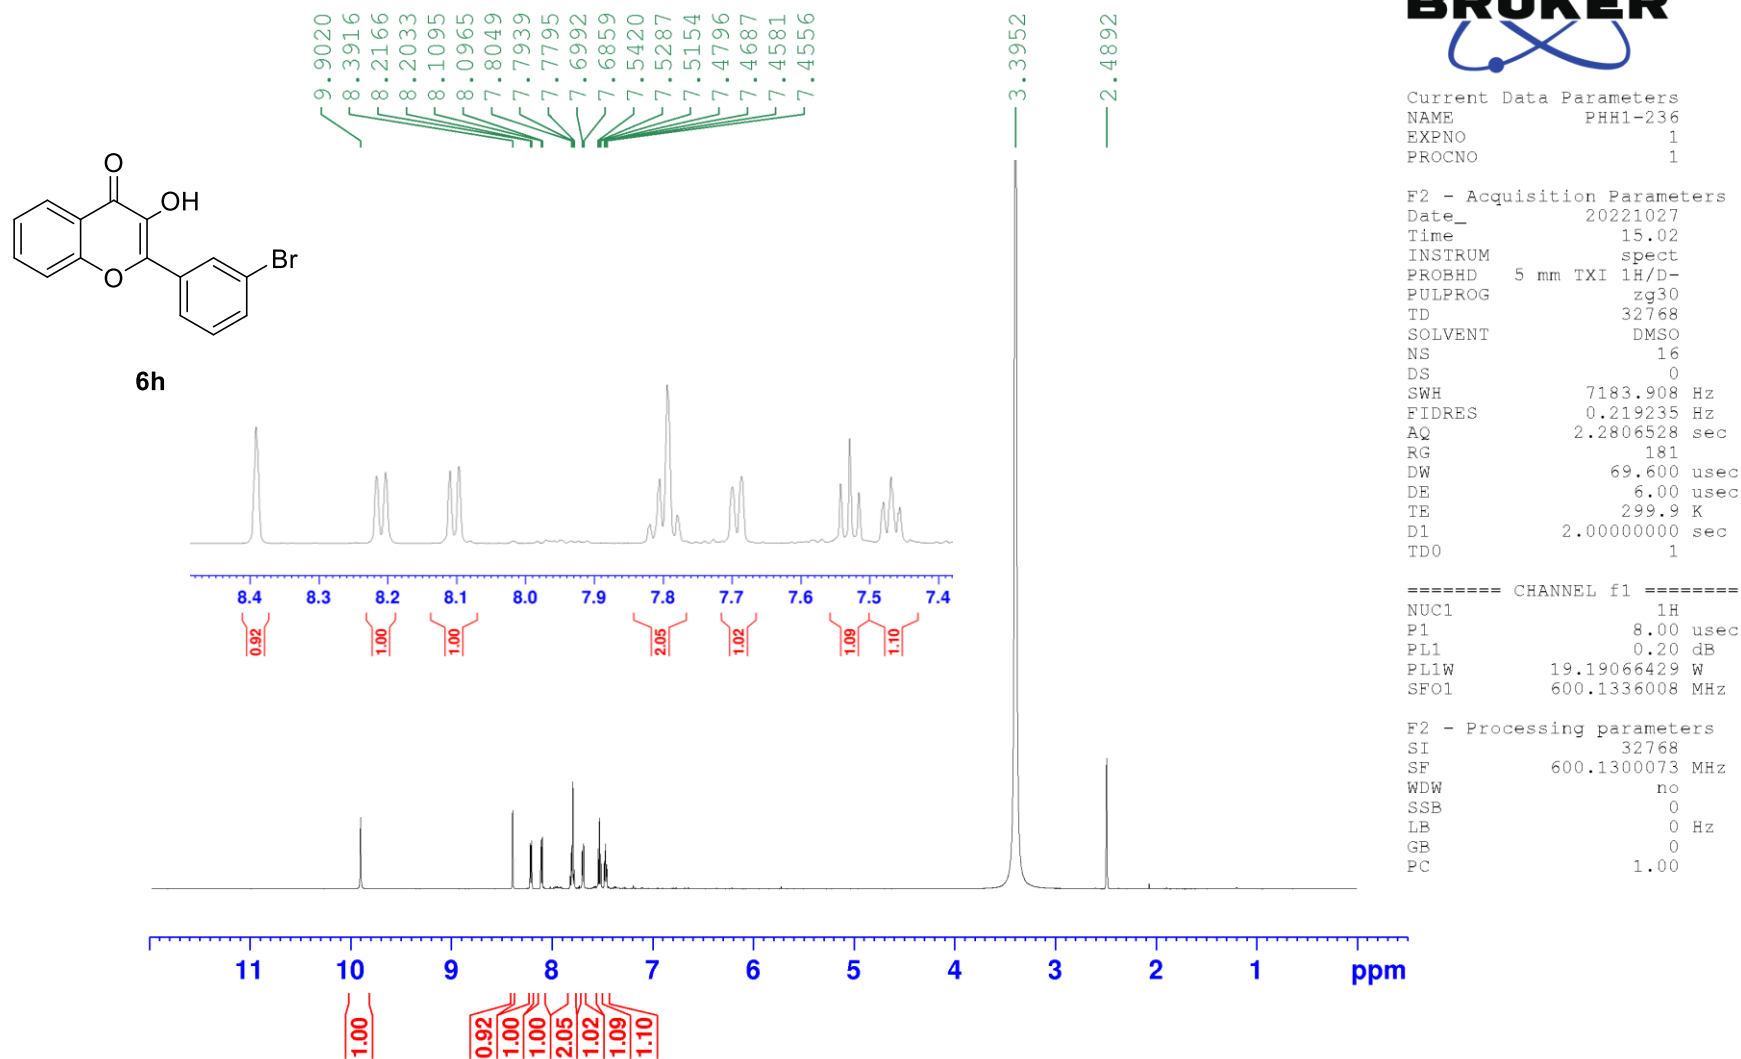

Figure S15. <sup>1</sup>H NMR (600 MHz, DMSO-*d*<sub>6</sub>) for compound **6h**.

13C of PHH1-236

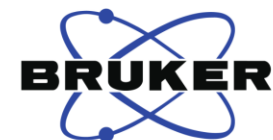

Current Data Parameters  
NAME PHH1-236  
EXPNO 2  
PROCNO 1

F2 - Acquisition Parameters  
Date\_ 20221026  
Time 9.57  
INSTRUM spect  
PROBHD 5 mm PABBO BB-  
PULPROG zgpg30  
TD 65536  
SOLVENT DMSO  
NS 1691  
DS 0  
SWH 33333.332 Hz  
FIDRES 0.508626 Hz  
AQ 0.9830400 sec  
RG 46300  
DW 15.000 usec  
DE 6.00 usec  
TE 299.2 K  
D1 2.40000010 sec  
D11 0.03000000 sec  
TD0 1

===== CHANNEL f1 =====  
NUC1 13C  
P1 10.00 usec  
PL1 -1.60 dB  
PL1W 136.15426636 W  
SFO1 150.9194083 MHz

===== CHANNEL f2 =====  
CPDPRG[2] waltz16  
NUC2 1H  
PCPD2 90.00 usec  
PL2 -1.50 dB  
PL12 13.20 dB  
PL13 16.20 dB  
PL2W 28.38507080 W  
PL12W 0.96181160 W  
PL13W 0.48204759 W  
SFO2 600.1339008 MHz

F2 - Processing parameters  
SI 32768  
SF 150.9028779 MHz  
WDW EM  
SSB 0  
LB 3.00 Hz  
GB 0  
PC 1.00

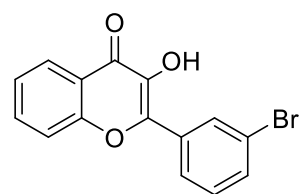

6h

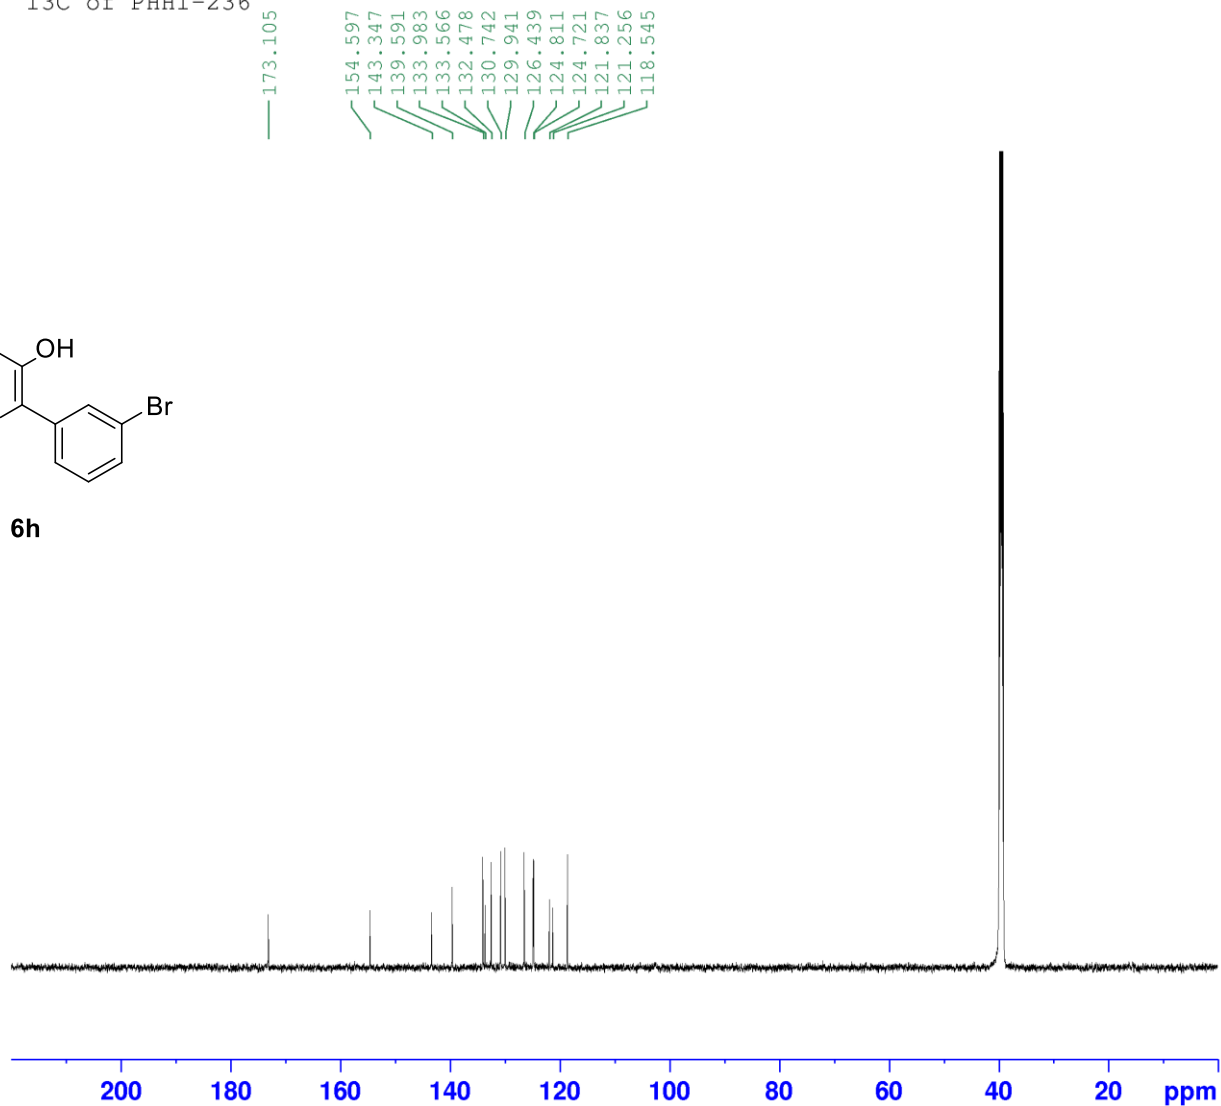

Figure S16.  $^{13}\text{C}$  NMR (150 MHz,  $\text{DMSO}-d_6$ ) for compound **6h**.

<sup>1</sup>H of PHH1-216

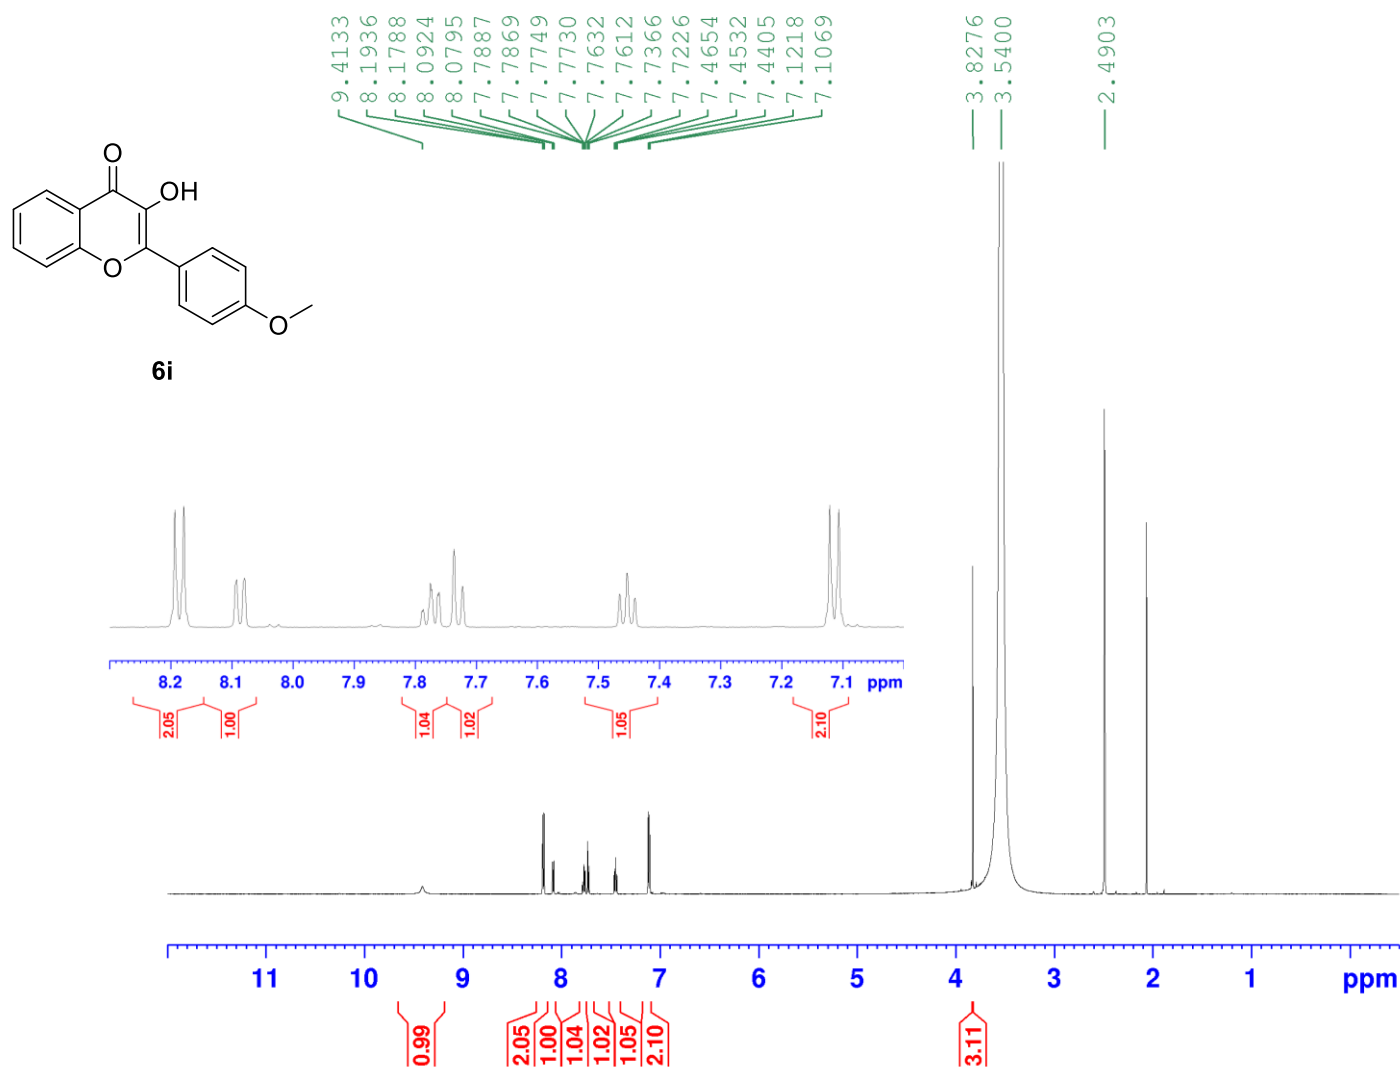

Current Data Parameters  
 NAME PHH1-216  
 EXPNO 1  
 PROCNO 1

F2 - Acquisition Parameters  
 Date\_ 20221101  
 Time 8.46  
 INSTRUM spect  
 PROBHD 5 mm TXI 1H/D-  
 PULPROG zg30  
 TD 32768  
 SOLVENT DMSO  
 NS 16  
 DS 0  
 SWH 7788.162 Hz  
 FIDRES 0.237676 Hz  
 AQ 2.1037056 sec  
 RG 128  
 DW 64.200 usec  
 DE 6.00 usec  
 TE 300.9 K  
 D1 2.00000000 sec  
 TD0 1

===== CHANNEL f1 =====  
 NUC1 1H  
 P1 8.00 usec  
 PL1 0.20 dB  
 PL1W 19.19066429 W  
 SFO1 600.1336008 MHz

F2 - Processing parameters  
 SI 16384  
 SF 600.1300073 MHz  
 WDW EM  
 SSB 0  
 LB 0 Hz  
 GB 0  
 PC 1.00

Figure S17. <sup>1</sup>H NMR (600 MHz, DMSO-*d*<sub>6</sub>) for compound **6i**.

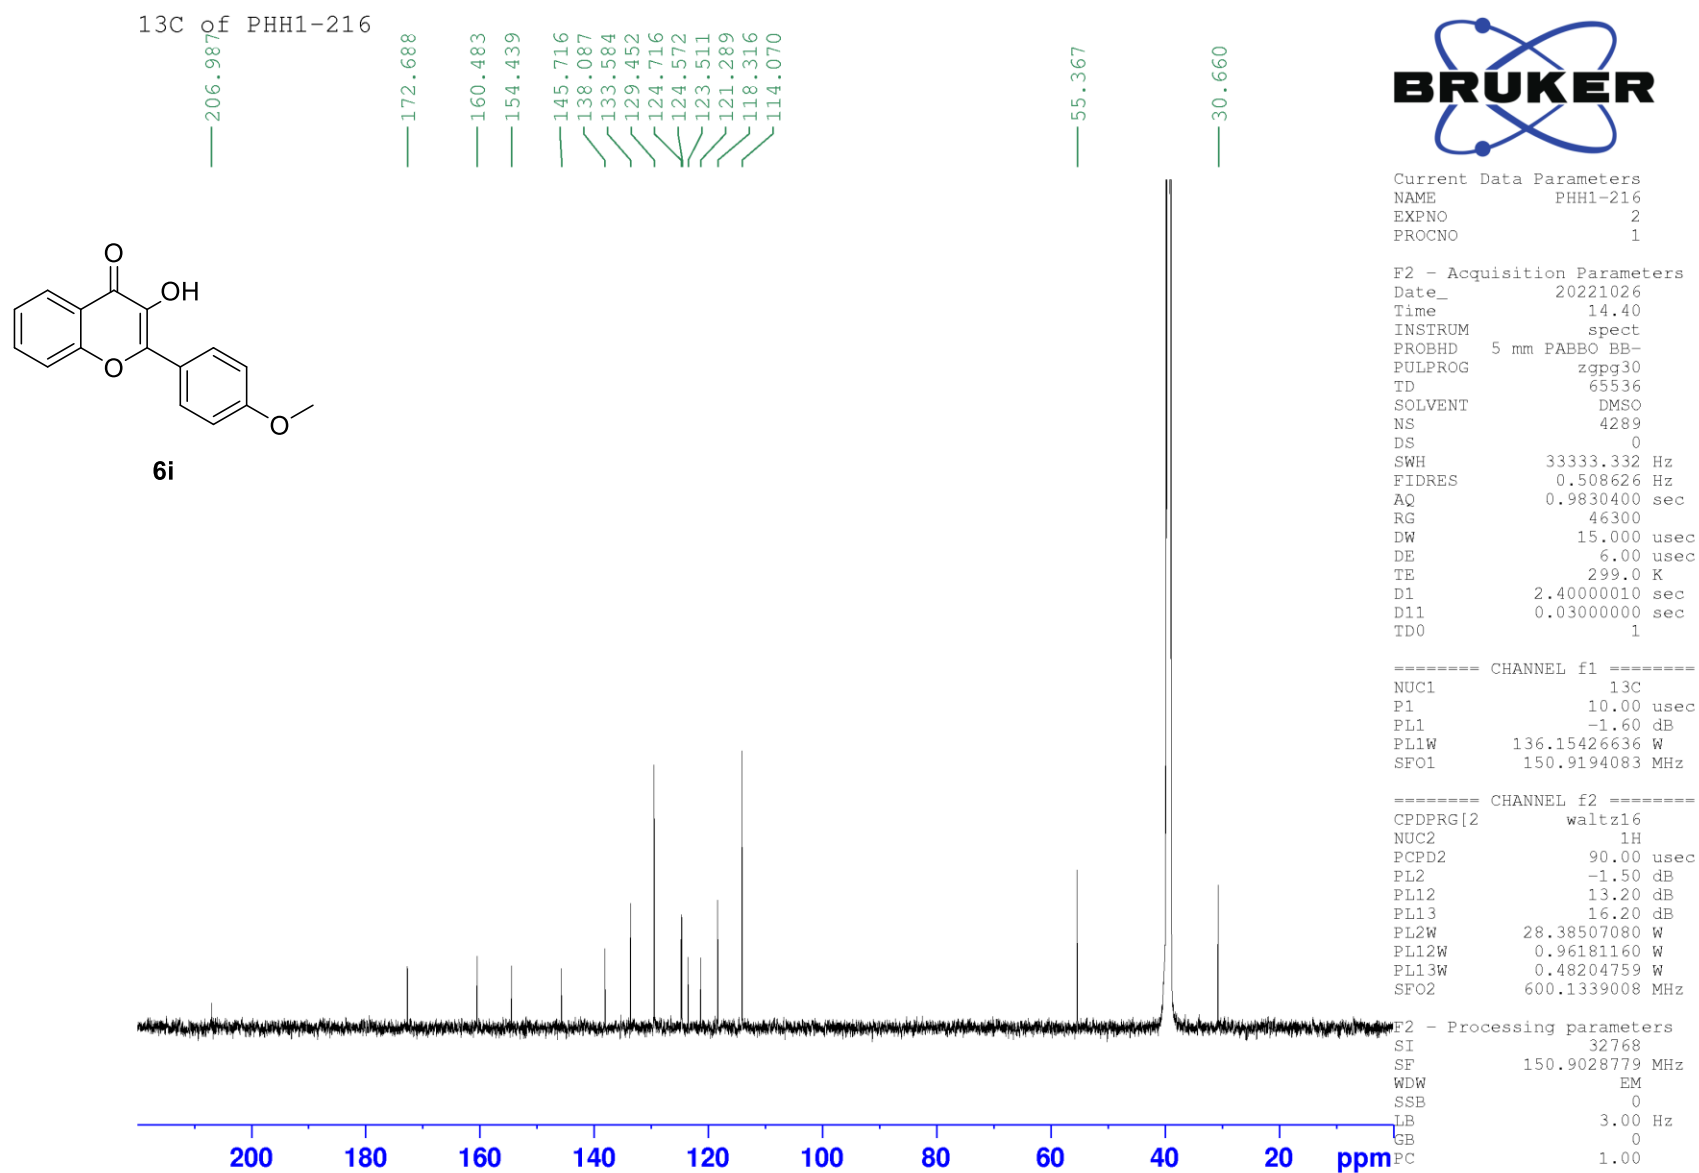

Figure S18.  $^{13}\text{C}$  NMR (150 MHz,  $\text{DMSO}-d_6$ ) for compound **6i**.

1H of PHH1-192

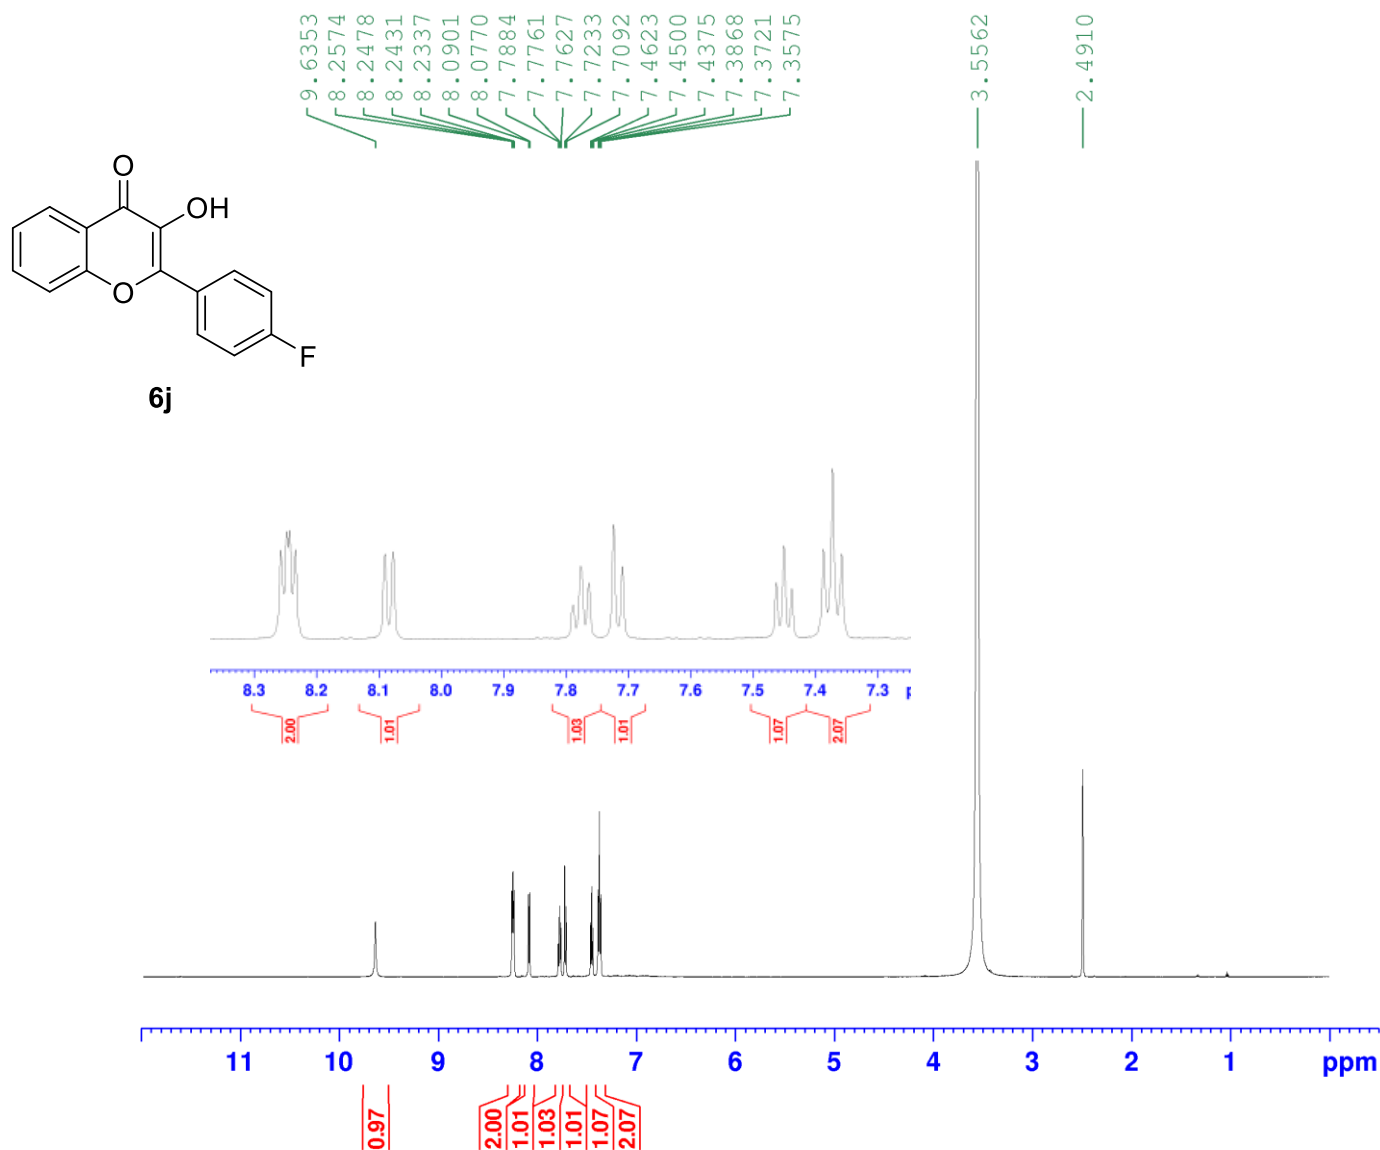

Current Data Parameters  
NAME PHH1-192  
EXPNO 1  
PROCNO 1

F2 - Acquisition Parameters  
Date\_ 20220627  
Time 16.43  
INSTRUM spect  
PROBHD 5 mm TXI 1H/D-  
PULPROG zg30  
TD 32768  
SOLVENT DMSO  
NS 16  
DS 0  
SWH 7183.908 Hz  
FIDRES 0.219235 Hz  
AQ 2.2806528 sec  
RG 724  
DW 69.600 usec  
DE 6.00 usec  
TE 302.2 K  
D1 2.00000000 sec  
TD0 1

===== CHANNEL f1 =====  
NUC1 1H  
P1 8.00 usec  
PL1 0.20 dB  
PL1W 19.19066429 W  
SFO1 600.1336008 MHz

F2 - Processing parameters  
SI 32768  
SF 600.1300073 MHz  
WDW no  
SSB 0  
LB 0 Hz  
GB 0  
PC 1.00

Figure S19. <sup>1</sup>H NMR (600 MHz, DMSO-*d*<sub>6</sub>) for compound **6j**.  
S22

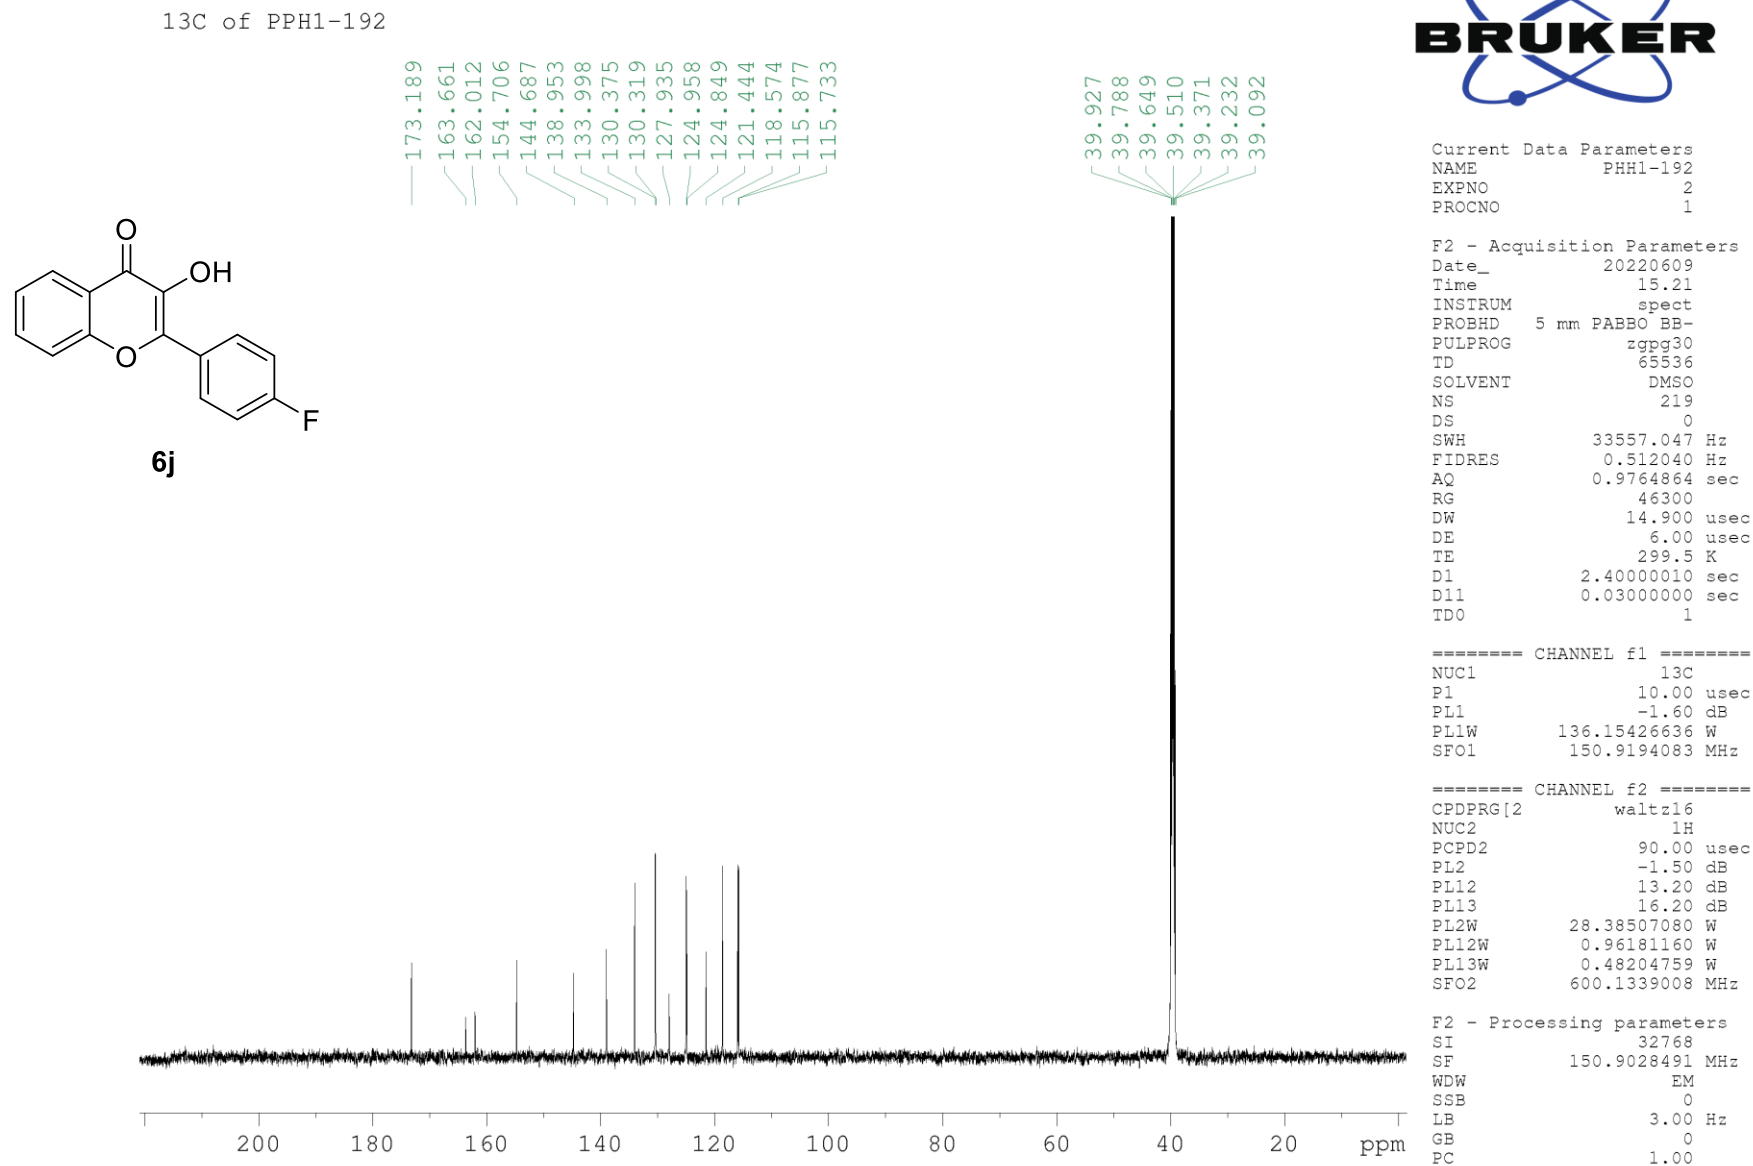

Figure S20. <sup>13</sup>C NMR (150 MHz, DMSO-*d*<sub>6</sub>) for compound **6j**.  
 S23

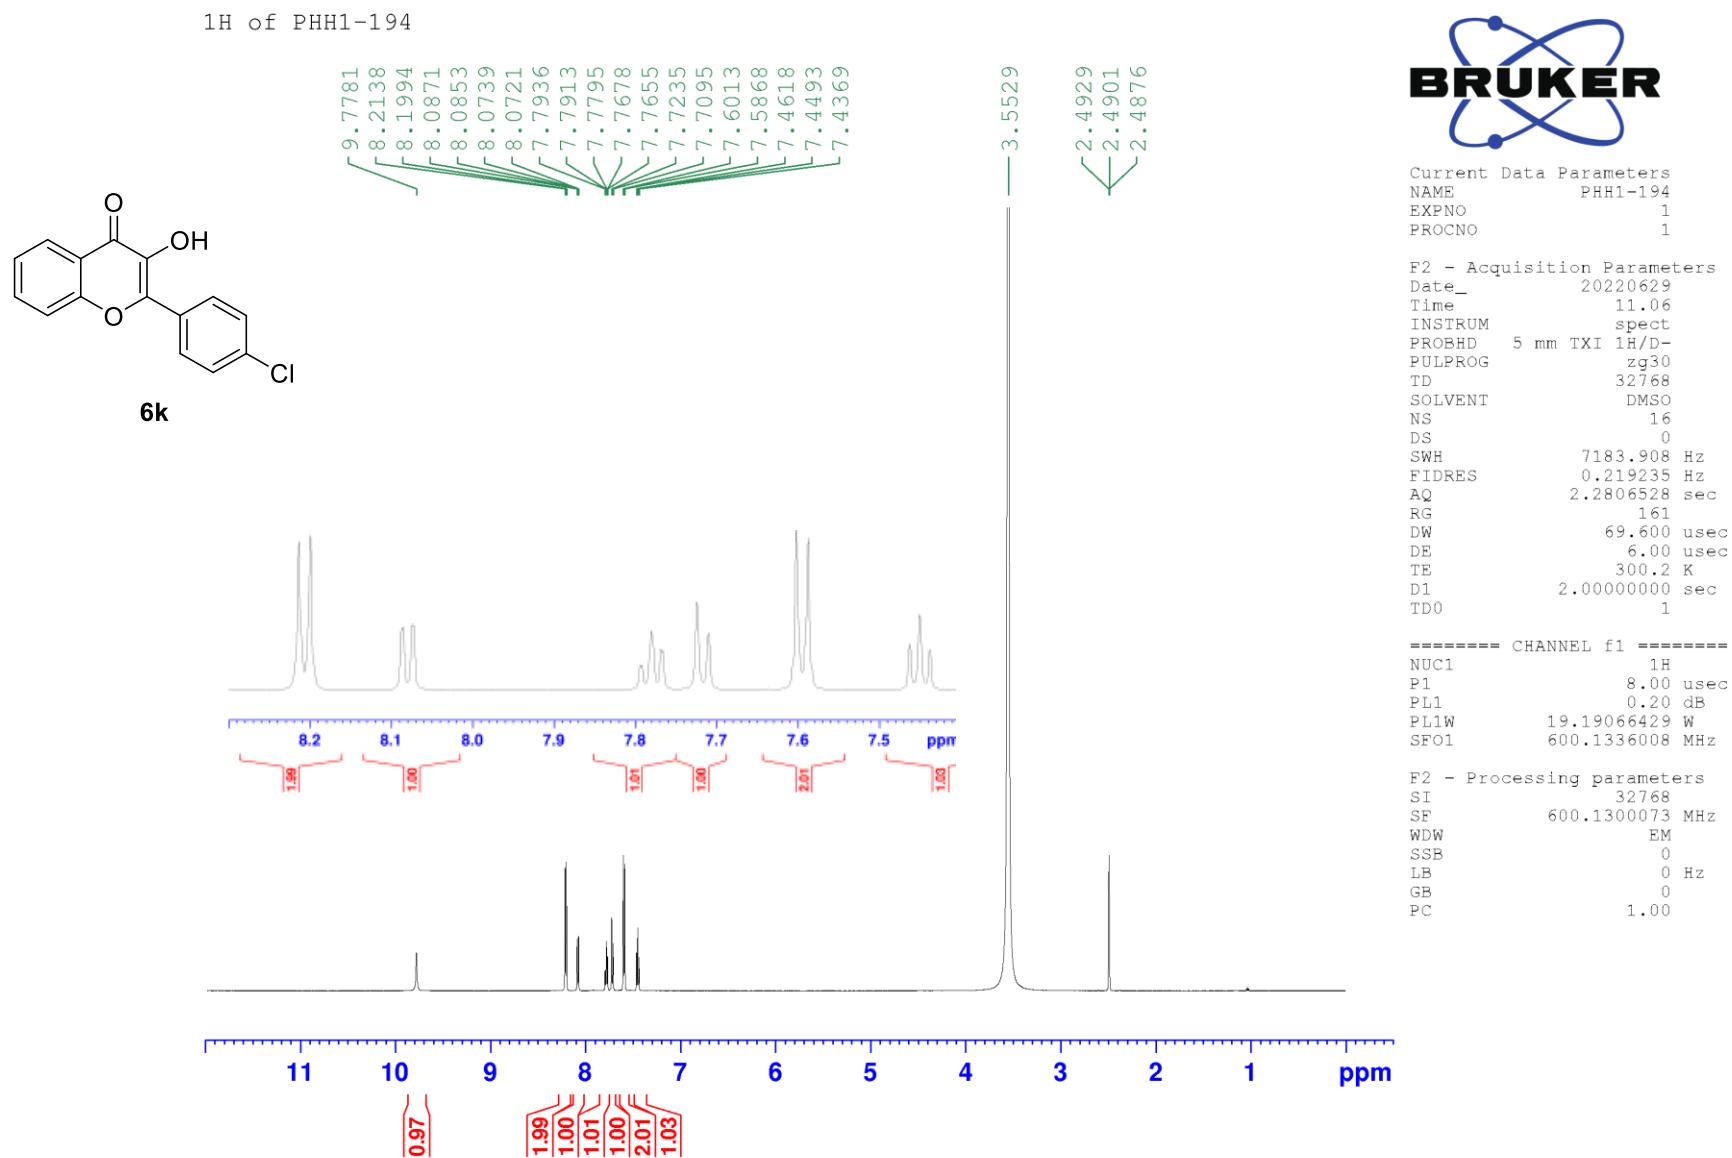

Figure S21.  $^1\text{H}$  NMR (600 MHz,  $\text{DMSO}-d_6$ ) for compound **6k**.



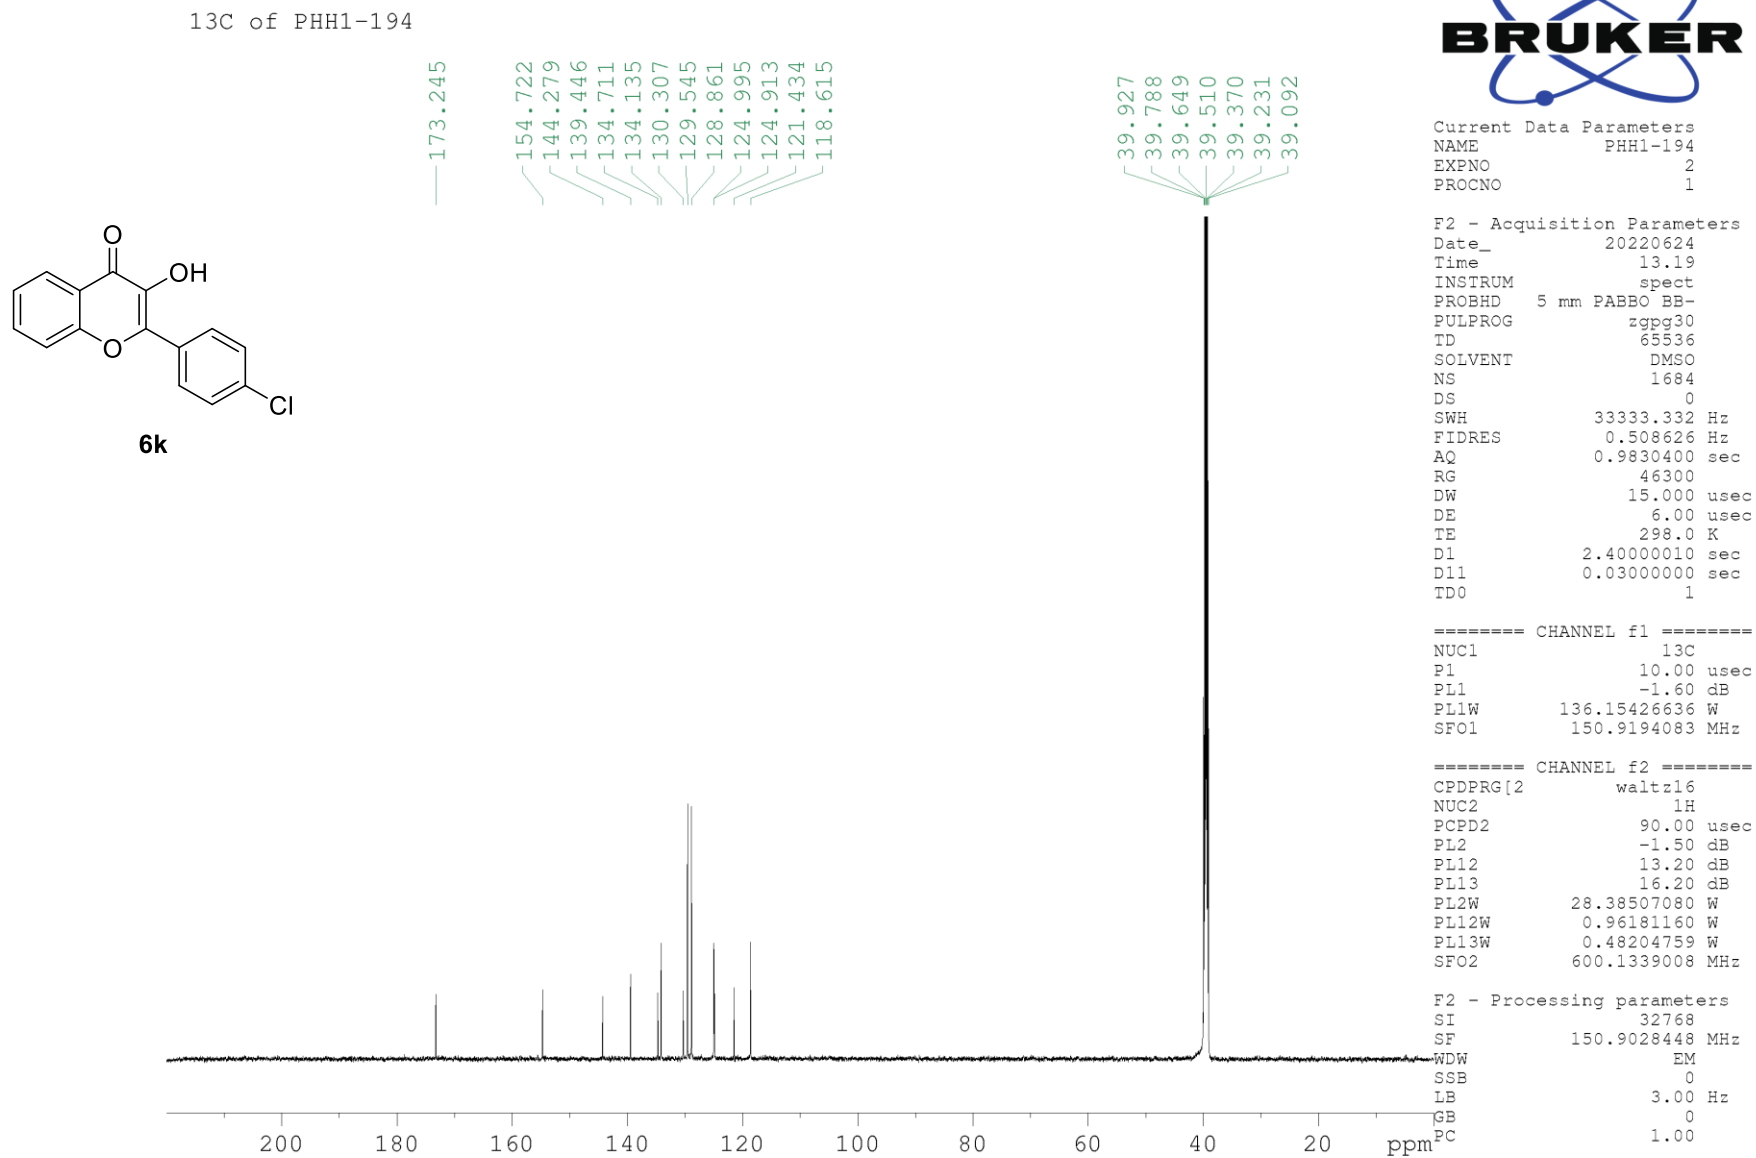

Figure S22. <sup>13</sup>C NMR (150 MHz, DMSO-*d*<sub>6</sub>) for compound **6k**.

<sup>1</sup>H of PHH1-191

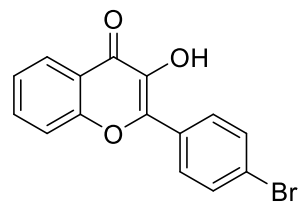

**6I**

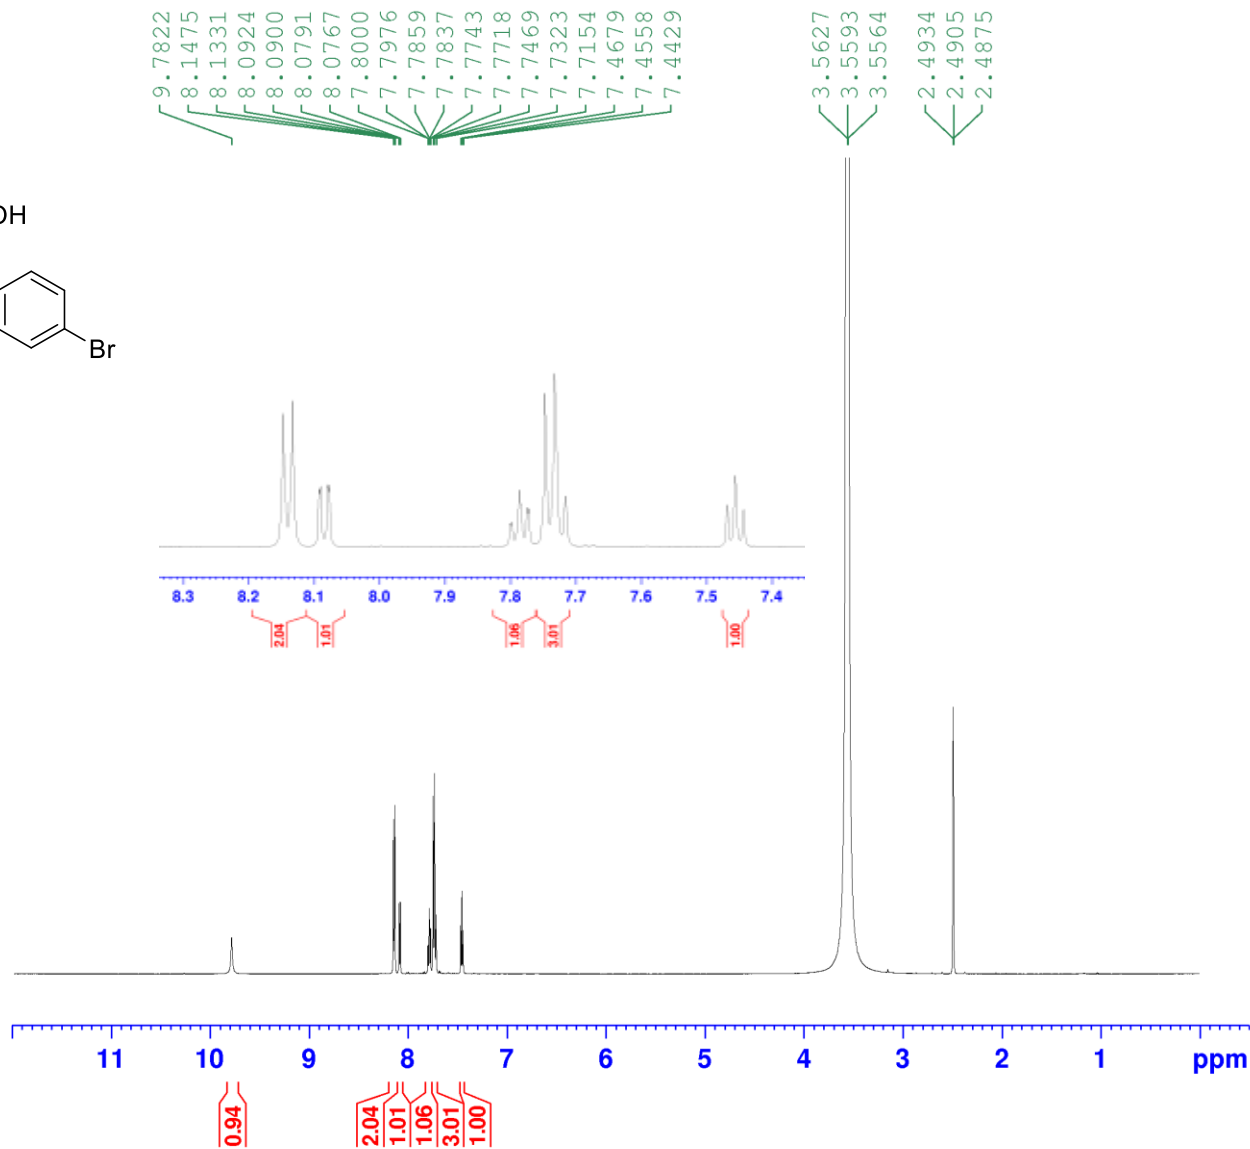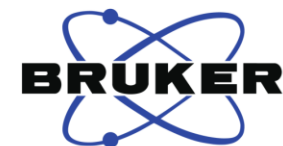

Current Data Parameters  
NAME PHH1-191  
EXPNO 1  
PROCNO 1

F2 - Acquisition Parameters  
Date\_ 20220617  
Time 16.14  
INSTRUM spect  
PROBHD 5 mm TXI 1H/D-  
PULPROG zg30  
TD 32768  
SOLVENT DMSO  
NS 16  
DS 0  
SWH 7183.908 Hz  
FIDRES 0.219235 Hz  
AQ 2.2806528 sec  
RG 144  
DW 69.600 usec  
DE 6.00 usec  
TE 301.7 K  
D1 2.00000000 sec  
TD0 1

===== CHANNEL f1 =====  
NUC1 1H  
P1 8.00 usec  
PL1 0.20 dB  
PL1W 19.19066429 W  
SFO1 600.1336008 MHz

F2 - Processing parameters  
SI 32768  
SF 600.1300073 MHz  
WDW EM  
SSB 0  
LB 0 Hz  
GB 0  
PC 1.00

Figure S23. <sup>1</sup>H NMR (600 MHz, DMSO-*d*<sub>6</sub>) for compound **6I**.

13C of PHH1-191

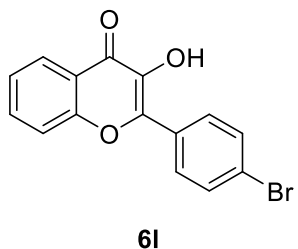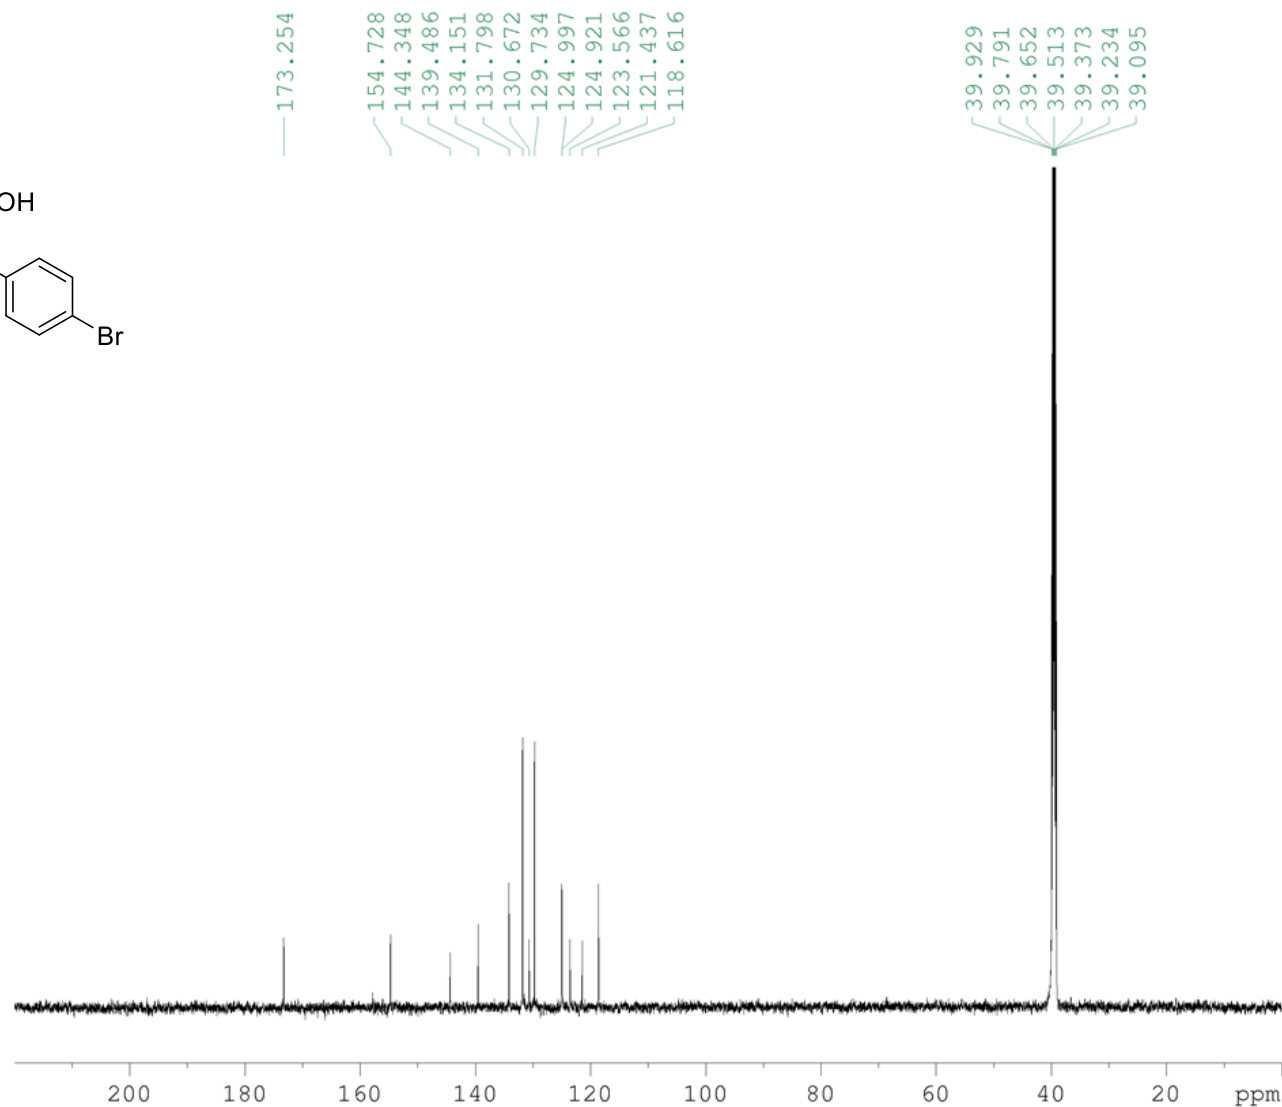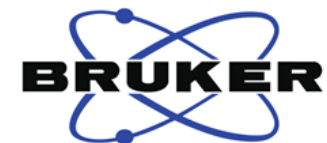

Current Data Parameters  
NAME PHH1-191  
EXPNO 2  
PROCNO 1

F2 - Acquisition Parameters  
Date\_ 20220609  
Time\_ 15.06  
INSTRUM spect  
PROBHD 5 mm PABBO BB-  
PULPROG zgpg30  
TD 65536  
SOLVENT DMSO  
NS 353  
DS 0  
SWH 33557.047 Hz  
FIDRES 0.512040 Hz  
AQ 0.9764864 sec  
RG 46300  
DW 14.900 usec  
DE 6.00 usec  
TE 299.6 K  
D1 2.40000010 sec  
D11 0.03000000 sec  
TD0 1

===== CHANNEL f1 =====  
NUC1 13C  
P1 10.00 usec  
PL1 -1.60 dB  
PL1W 136.15426636 W  
SFO1 150.9194083 MHz

===== CHANNEL f2 =====  
CPDPRG[2] waltz16  
NUC2 1H  
PCPD2 90.00 usec  
PL2 -1.50 dB  
PL12 13.20 dB  
PL13 16.20 dB  
PL2W 28.38507080 W  
PL12W 0.96181160 W  
PL13W 0.48204759 W  
SFO2 600.1339008 MHz

F2 - Processing parameters  
SI 32768  
SF 150.9028466 MHz  
WDW EM  
SSB 0  
LB 3.00 Hz  
GB 0  
PC 1.00

Figure S24.  $^{13}\text{C}$  NMR (150 MHz,  $\text{DMSO}-d_6$ ) for compound **6l**.  
S27

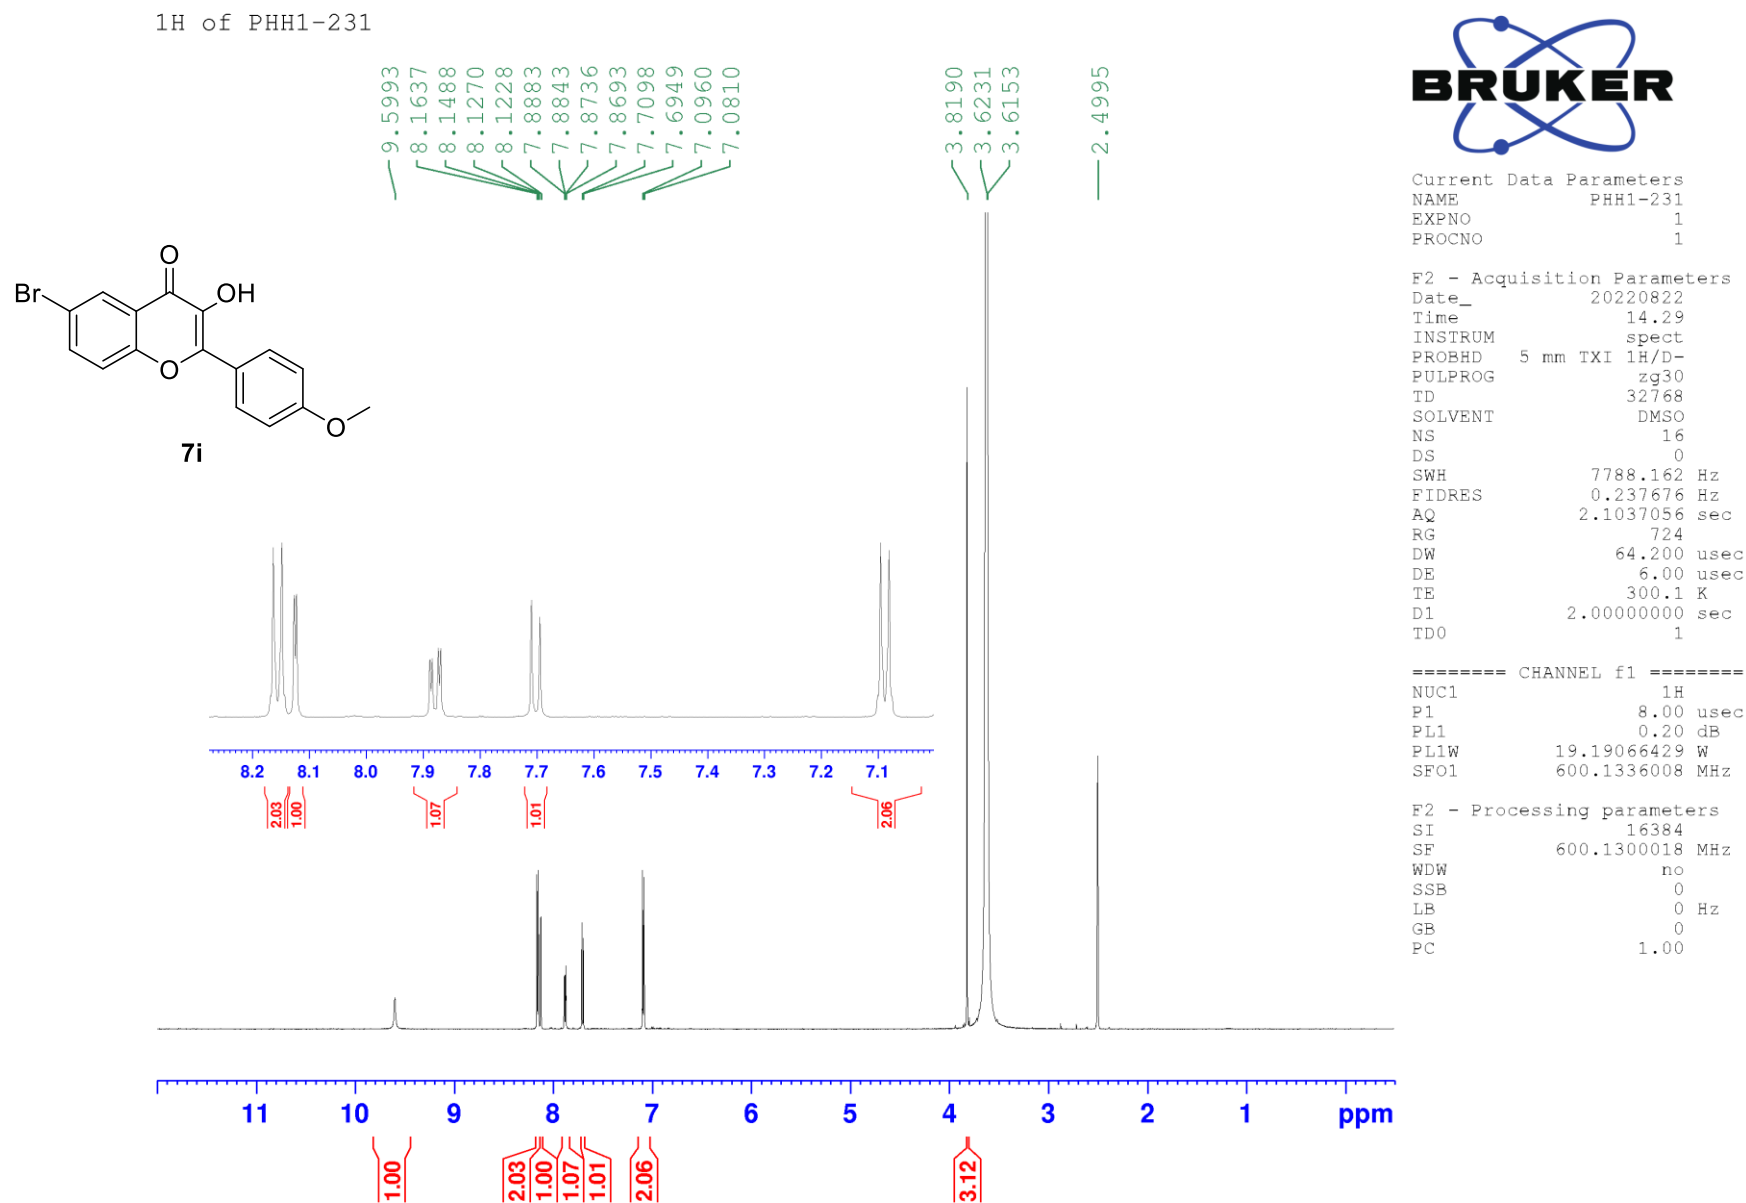

Figure S25. <sup>1</sup>H NMR (600 MHz, DMSO-*d*<sub>6</sub>) for compound **7i**.

13C of PHH1-231

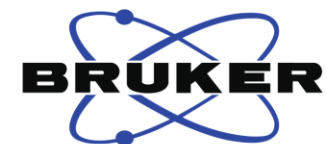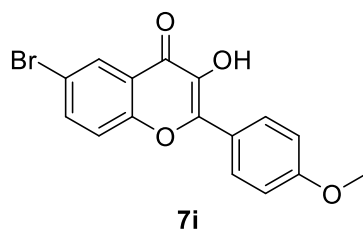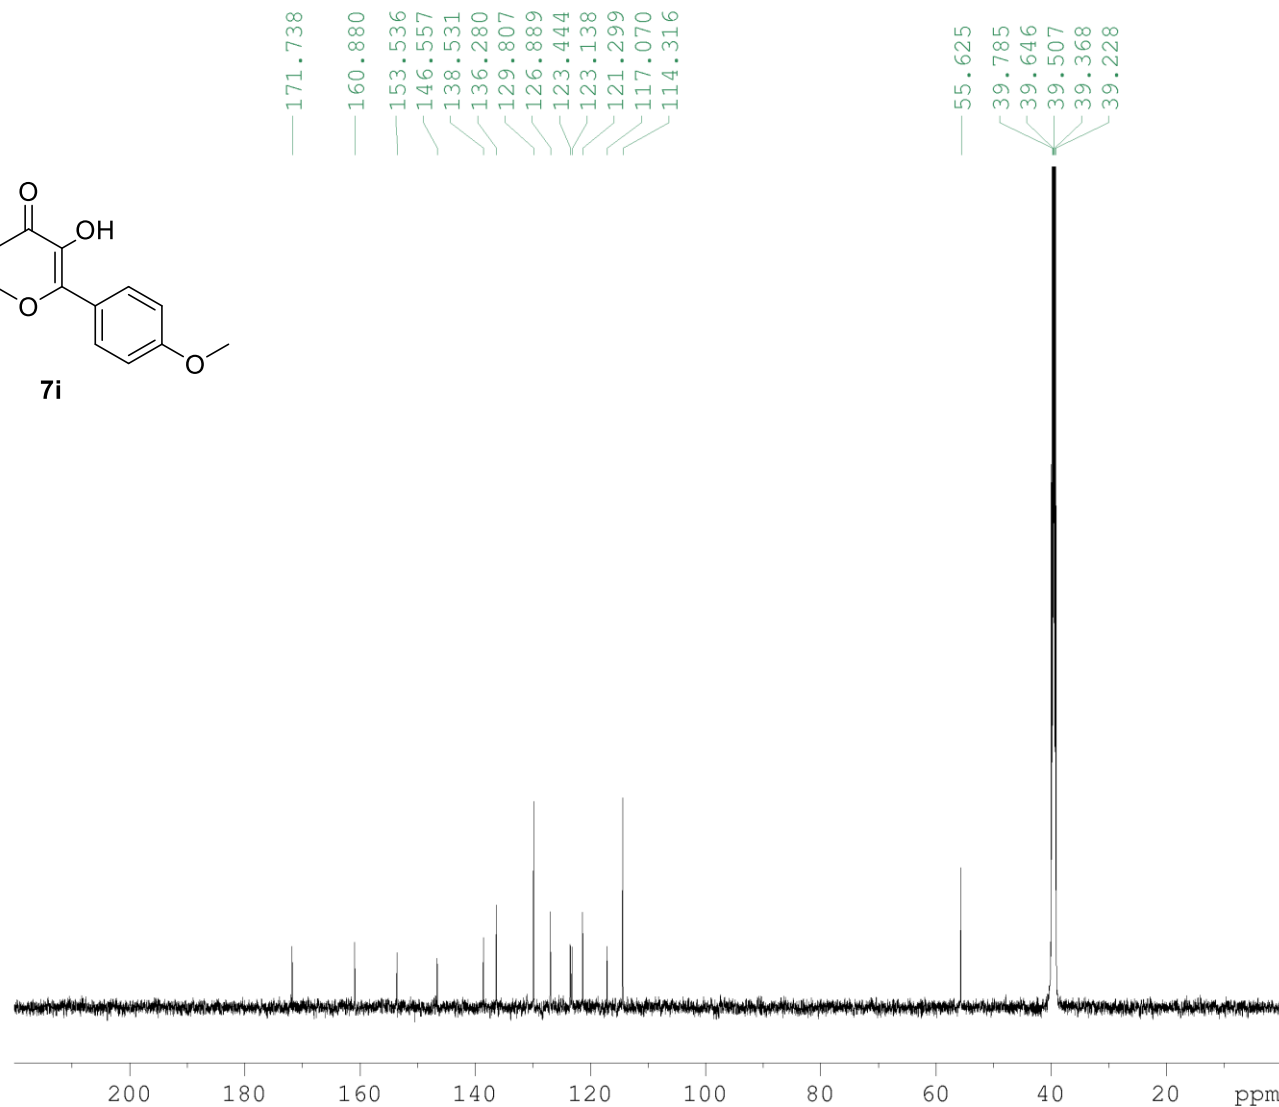

Current Data Parameters  
NAME PHH1-231  
EXPNO 2  
PROCNO 1

F2 - Acquisition Parameters  
Date\_ 20220817  
Time 13.53  
INSTRUM spect  
PROBHD 5 mm PABBO BB-  
PULPROG zgpg30  
TD 65536  
SOLVENT DMSO  
NS 541  
DS 0  
SWH 33333.332 Hz  
FIDRES 0.508626 Hz  
AQ 0.9830400 sec  
RG 46300  
DW 15.000 usec  
DE 6.00 usec  
TE 298.4 K  
D1 2.40000010 sec  
D11 0.03000000 sec  
TD0 1

===== CHANNEL f1 =====  
NUC1 13C  
P1 10.00 usec  
PL1 -1.60 dB  
PL1W 136.15426636 W  
SFO1 150.9194083 MHz

===== CHANNEL f2 =====  
CPDPRG[2] waltz16  
NUC2 1H  
PCPD2 90.00 usec  
PL2 -1.50 dB  
PL12 13.20 dB  
PL13 16.20 dB  
PL2W 28.38507080 W  
PL12W 0.96181160 W  
PL13W 0.48204759 W  
SFO2 600.1339008 MHz

F2 - Processing parameters  
SI 32768  
SF 150.9028363 MHz  
WDW EM  
SSB 0  
LB 3.00 Hz  
GB 0  
PC 1.00

Figure S26. <sup>13</sup>C NMR (150 MHz, DMSO-*d*<sub>6</sub>) for compound **7i**.  
S29

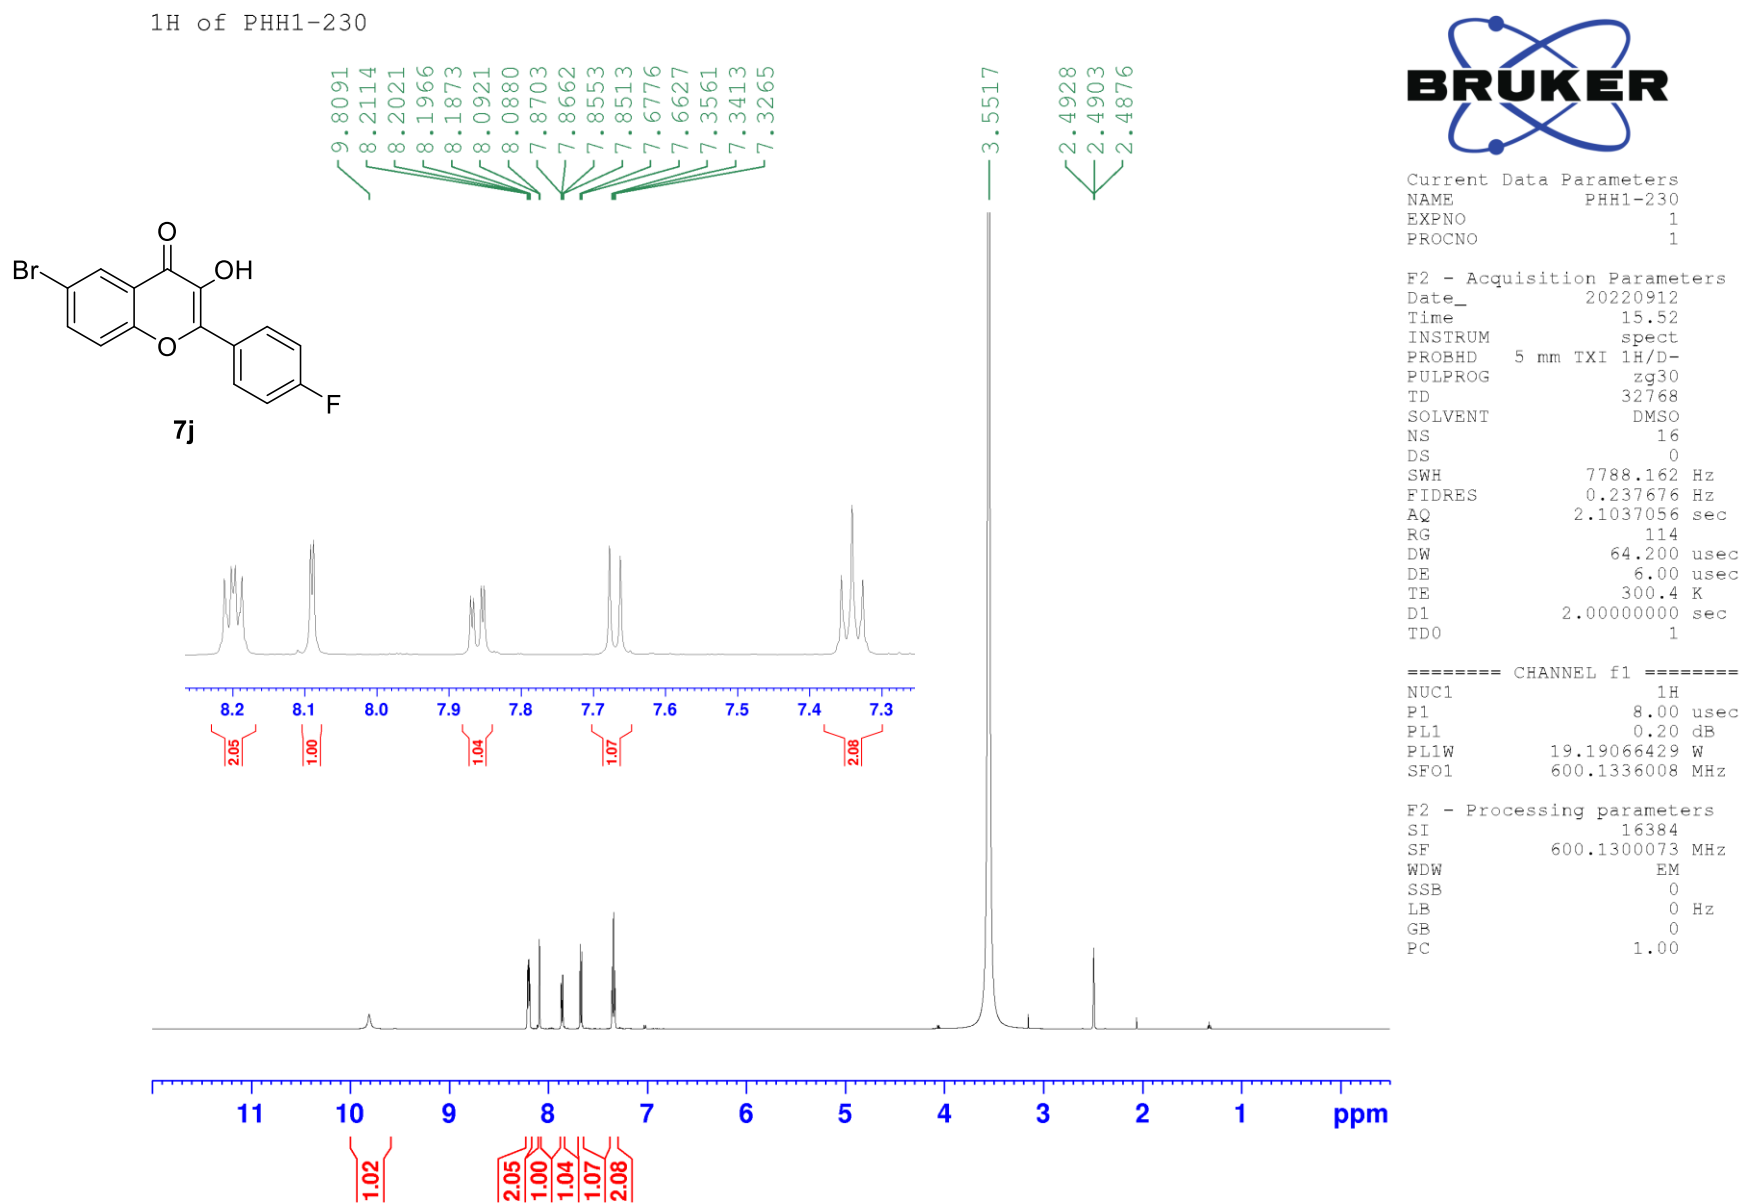

Figure S27.  $^1\text{H}$  NMR (600 MHz,  $\text{DMSO}-d_6$ ) for compound **7j**.

13C of PHH1-230

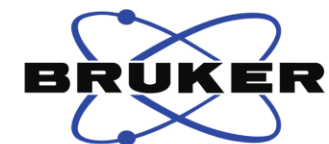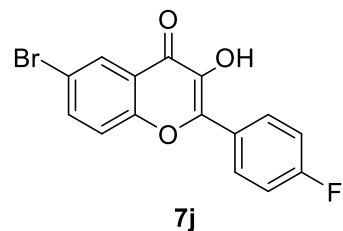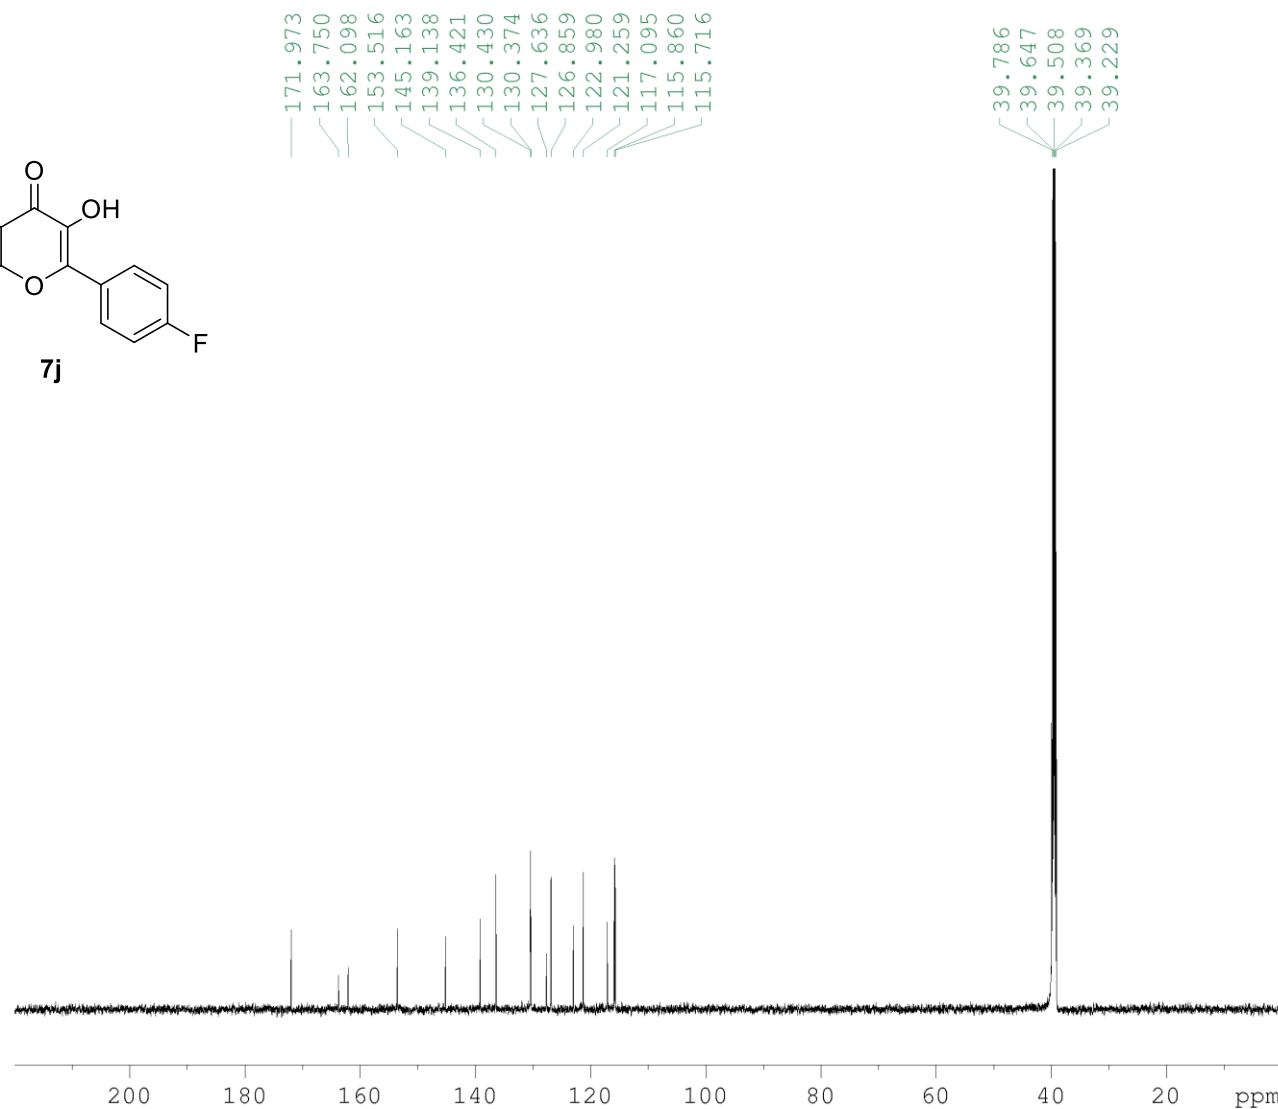

Current Data Parameters  
NAME PHH1-230  
EXPNO 2  
PROCNO 1

F2 - Acquisition Parameters  
Date\_ 20220908  
Time 16.02  
INSTRUM spect  
PROBHD 5 mm PABBO BB-  
PULPROG zgpg30  
TD 65536  
SOLVENT DMSO  
NS 248  
DS 0  
SWH 33333.332 Hz  
FIDRES 0.508626 Hz  
AQ 0.9830400 sec  
RG 46300  
DW 15.000 usec  
DE 6.00 usec  
TE 299.4 K  
D1 2.40000010 sec  
D11 0.03000000 sec  
TD0 1

===== CHANNEL f1 =====  
NUC1 13C  
P1 10.00 usec  
PL1 -1.60 dB  
PL1W 136.15426636 W  
SFO1 150.9194083 MHz

===== CHANNEL f2 =====  
CPDPRG[2] waltz16  
NUC2 1H  
PCPD2 90.00 usec  
PL2 -1.50 dB  
PL12 13.20 dB  
PL13 16.20 dB  
PL2W 28.38507080 W  
PL12W 0.96181160 W  
PL13W 0.48204759 W  
SFO2 600.1339008 MHz

F2 - Processing parameters  
SI 32768  
SF 150.9028466 MHz  
WDW EM  
SSB 0  
LB 3.00 Hz  
GB 0  
PC 1.00

Figure S28.  $^{13}\text{C}$  NMR (150 MHz,  $\text{DMSO}-d_6$ ) for compound **7j**.

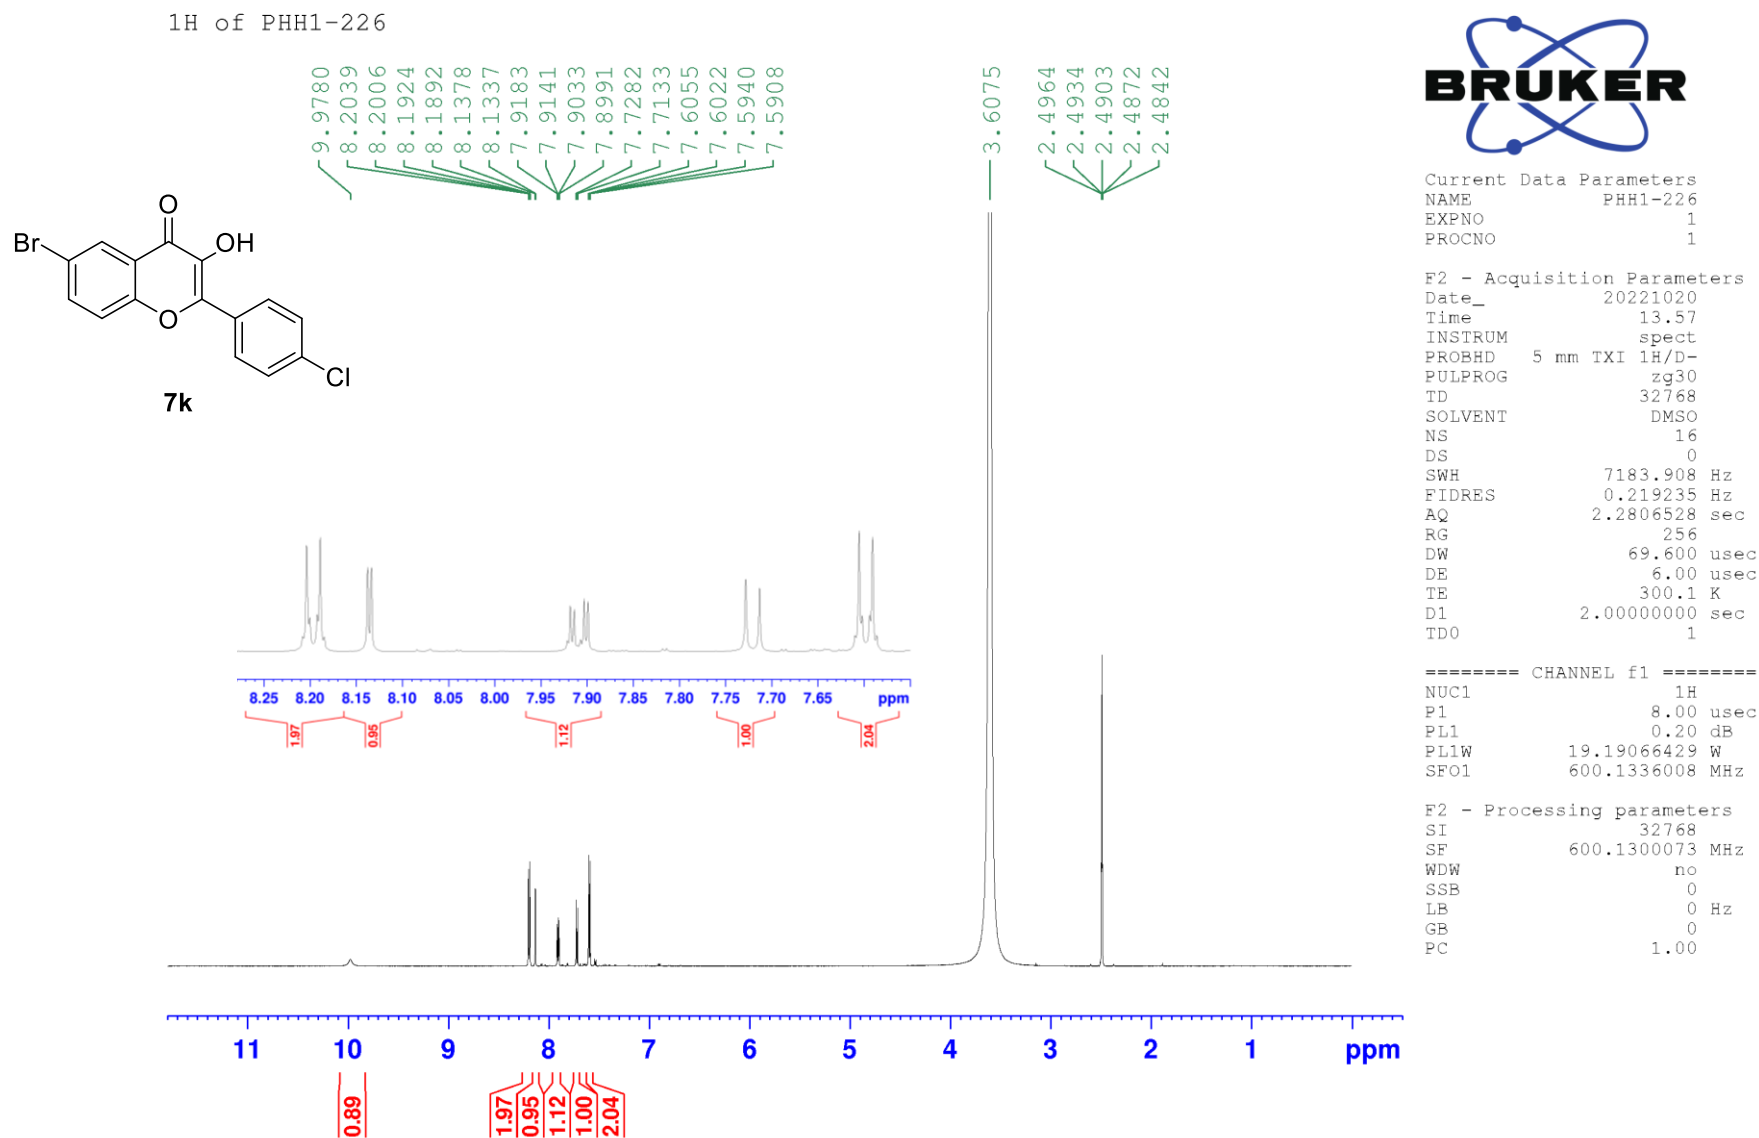

Figure S29. <sup>1</sup>H NMR (600 MHz, DMSO-*d*<sub>6</sub>) for compound **7k**.



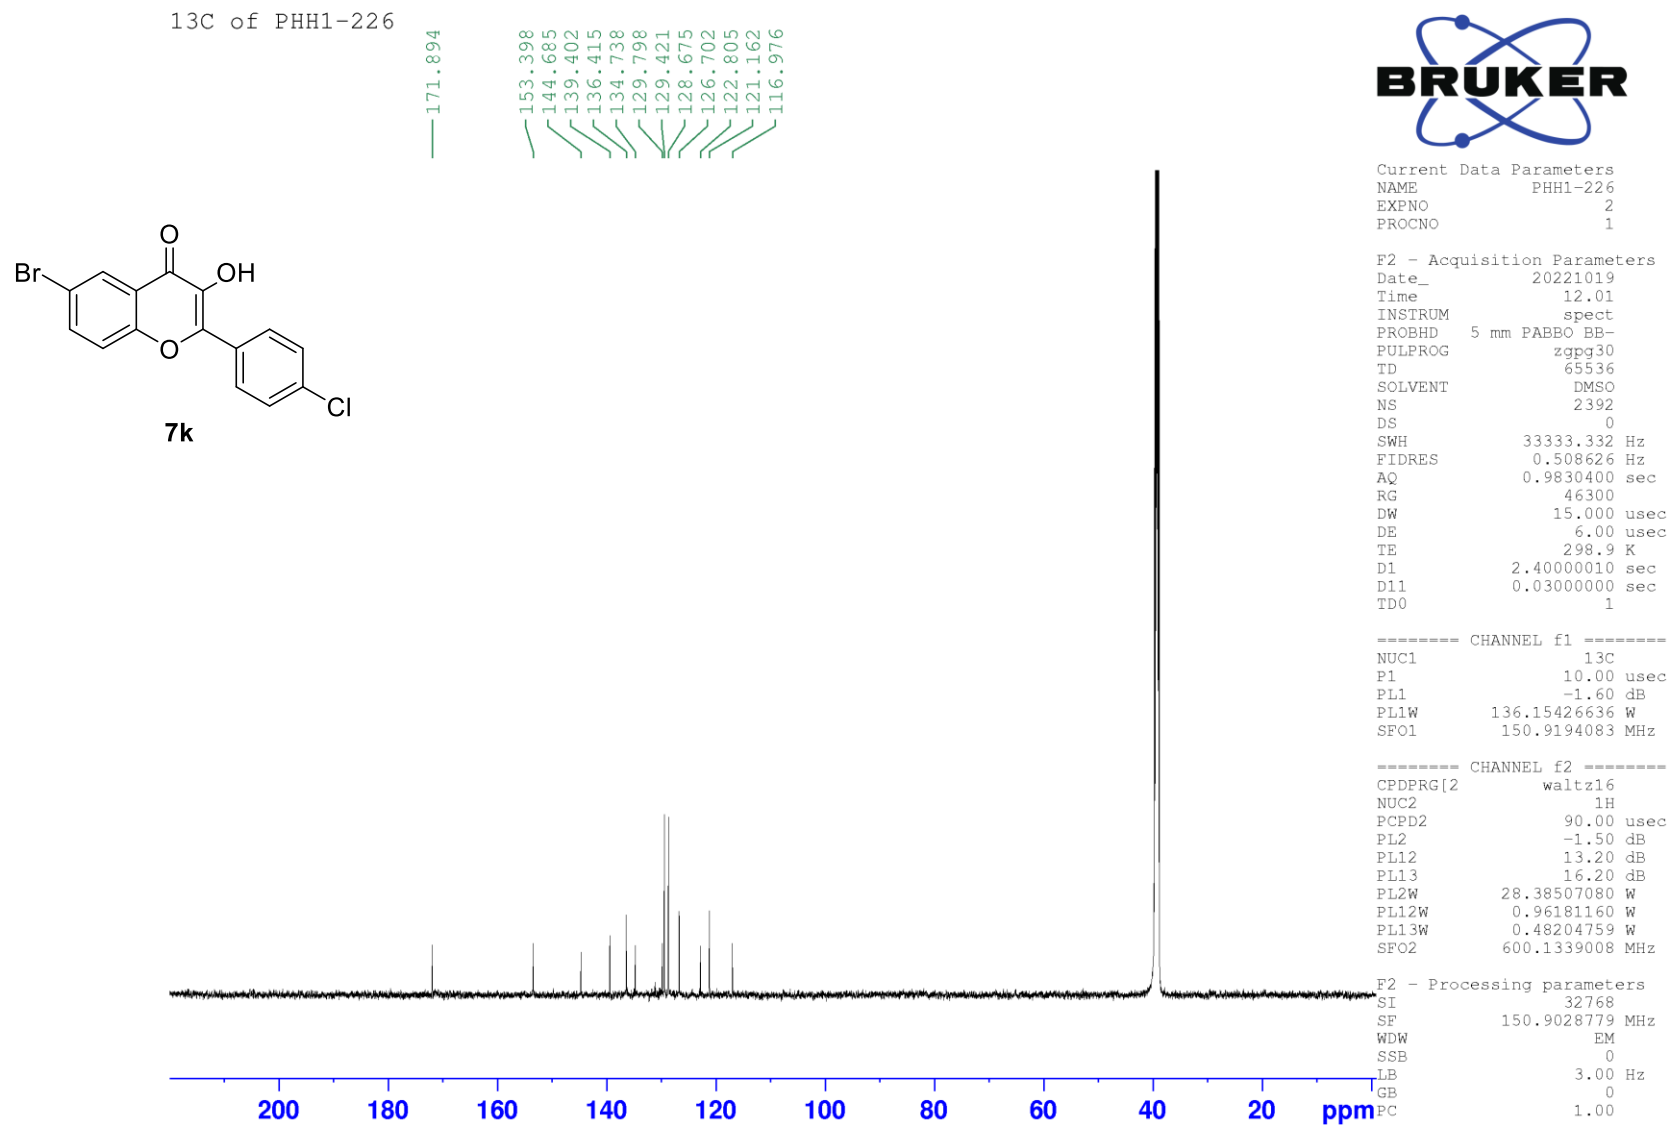

Figure S30.  $^{13}\text{C}$  NMR (150 MHz,  $\text{DMSO}-d_6$ ) for compound **7k**.

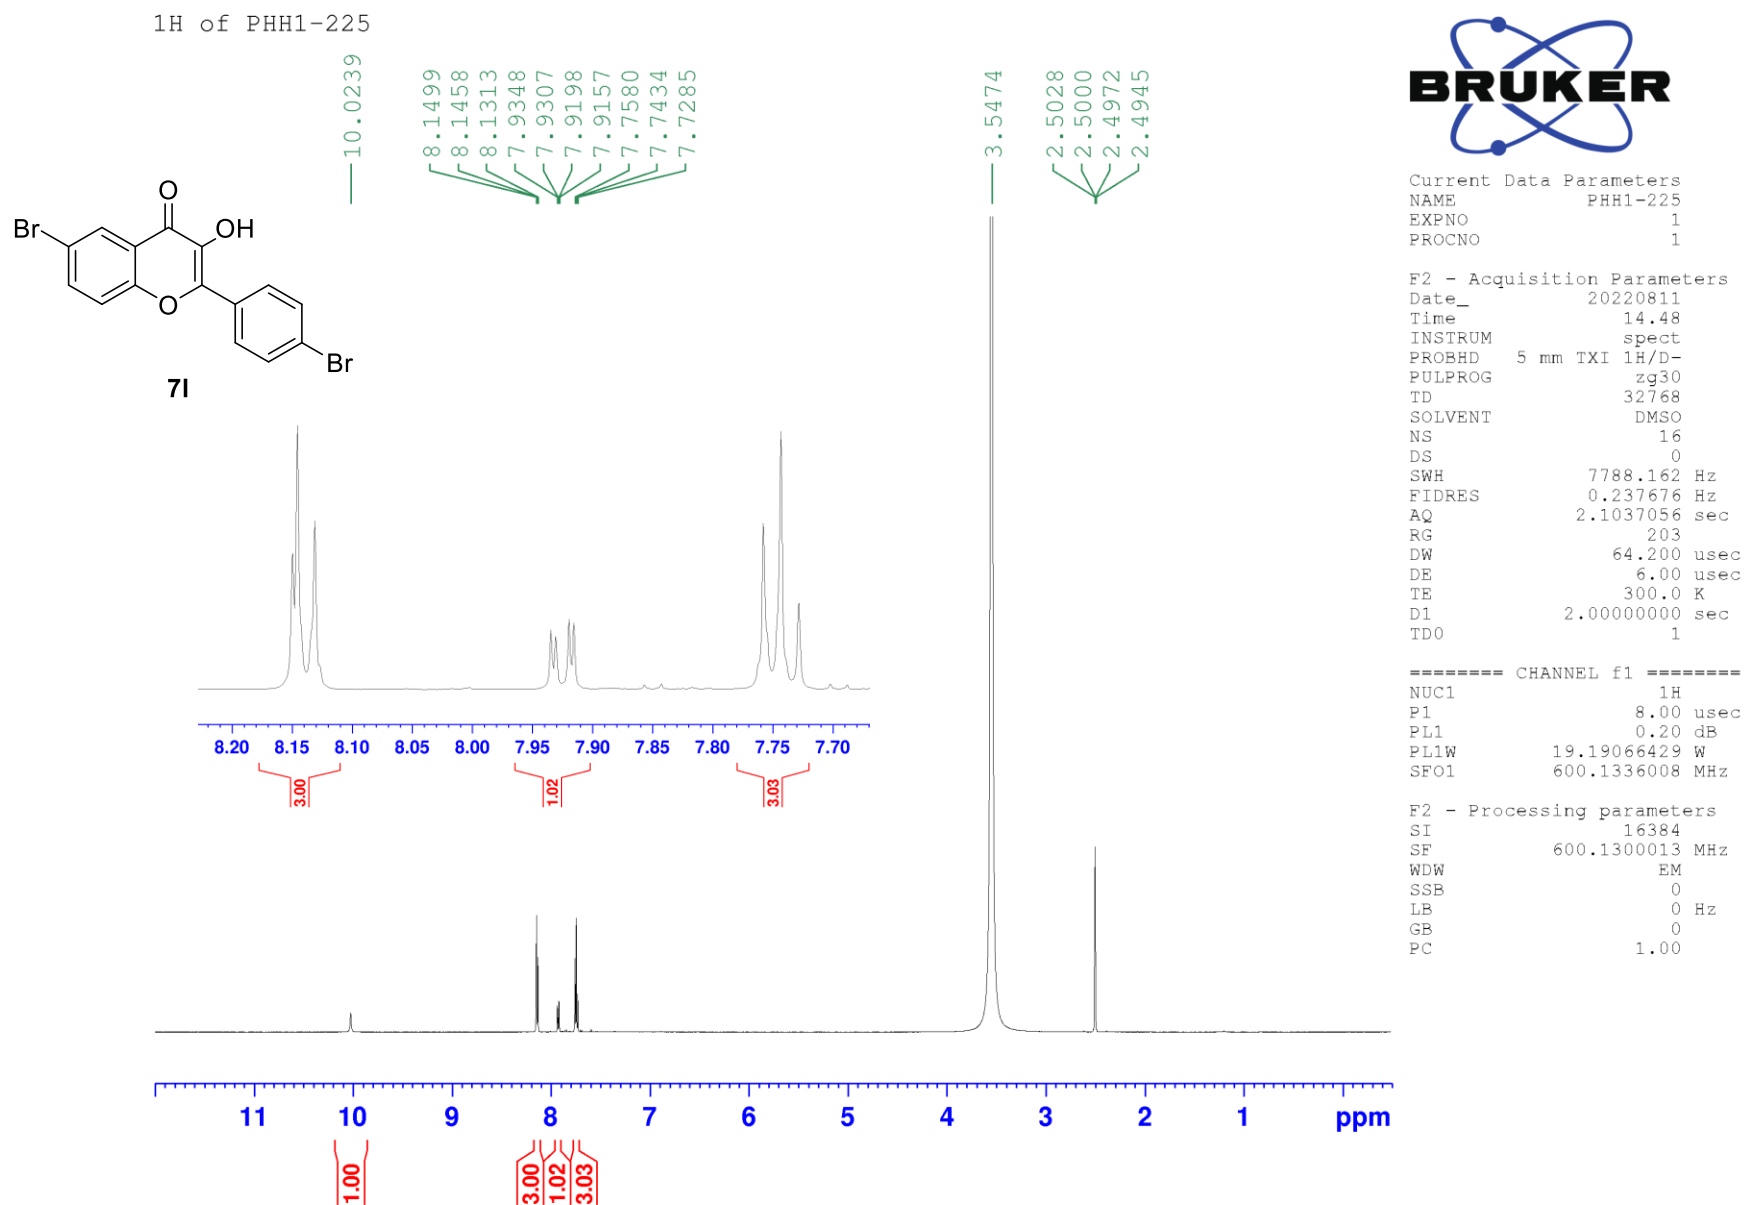

Figure S31.  $^1\text{H}$  NMR (600 MHz,  $\text{DMSO}-d_6$ ) for compound **7l**.



13C of PHH1-225

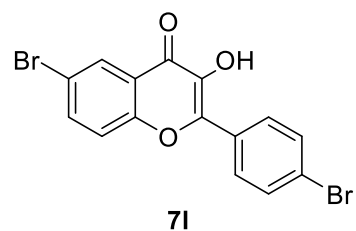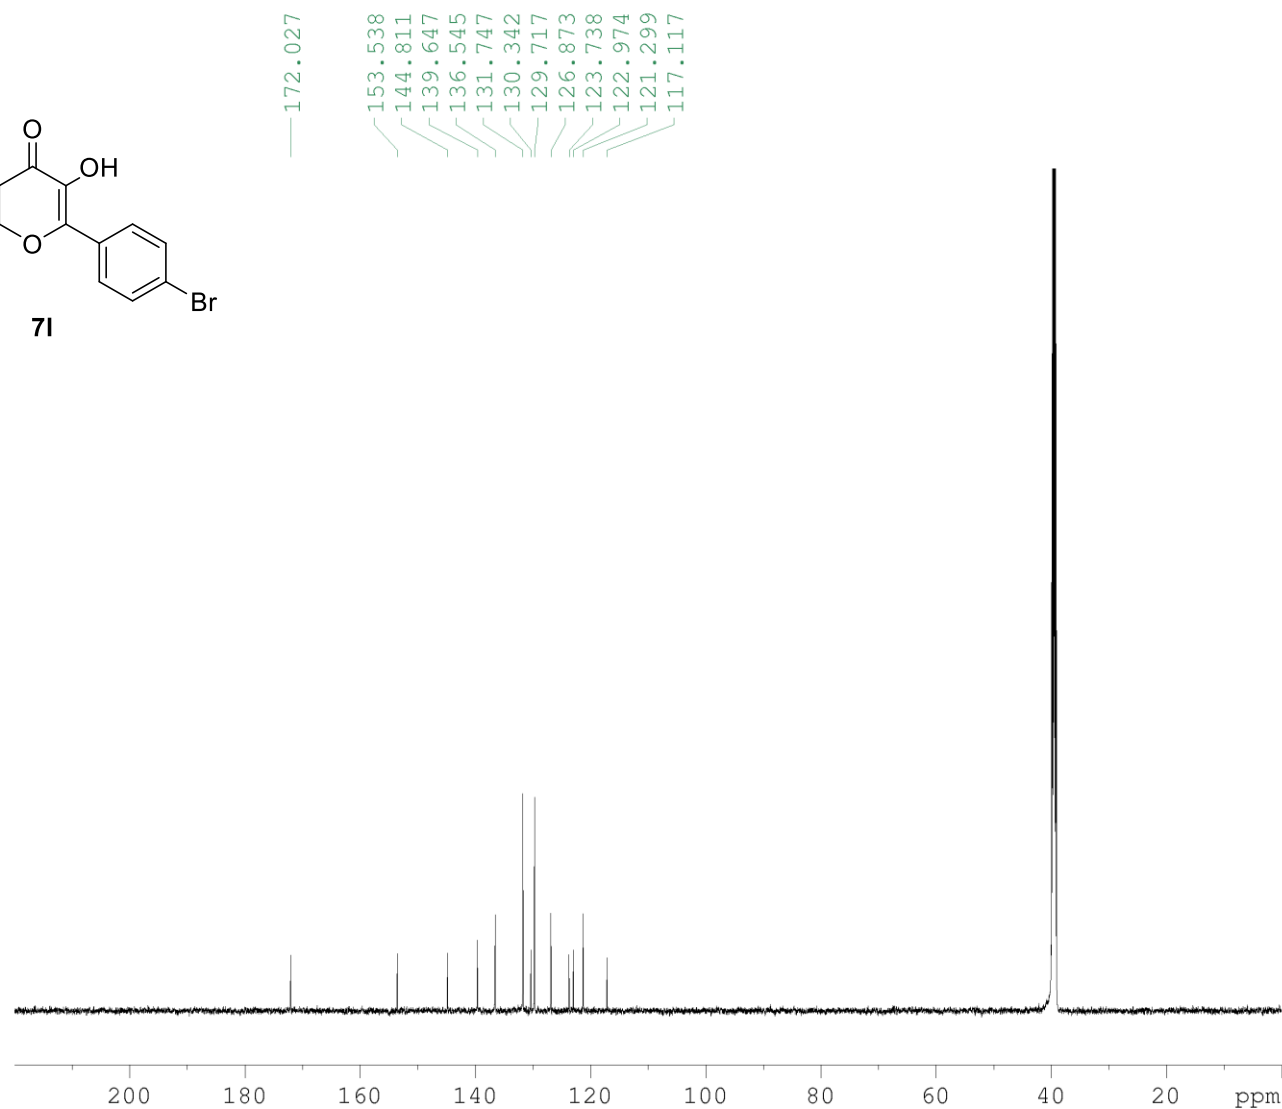

Current Data Parameters  
NAME PHH1-225  
EXPNO 2  
PROCNO 1

F2 - Acquisition Parameters  
Date\_ 20220725  
Time 13.15  
INSTRUM spect  
PROBHD 5 mm PABBO BB-  
PULPROG zgpg30  
TD 65536  
SOLVENT DMSO  
NS 980  
DS 0  
SWH 36231.883 Hz  
FIDRES 0.552855 Hz  
AQ 0.9043968 sec  
RG 46300  
DW 13.800 usec  
DE 6.00 usec  
TE 299.9 K  
D1 2.40000010 sec  
D11 0.03000000 sec  
TD0 1

===== CHANNEL f1 =====  
NUC1 13C  
P1 10.00 usec  
PL1 -1.60 dB  
PL1W 136.15426636 W  
SFO1 150.9194083 MHz

===== CHANNEL f2 =====  
CPDPRG[2] waltz16  
NUC2 1H  
PCPD2 90.00 usec  
PL2 -1.50 dB  
PL12 13.20 dB  
PL13 16.20 dB  
PL2W 28.38507080 W  
PL12W 0.96181160 W  
PL13W 0.48204759 W  
SFO2 600.1339008 MHz

F2 - Processing parameters  
SI 32768  
SF 150.9028528 MHz  
WDW EM  
SSB 0  
LB 3.00 Hz  
GB 0  
PC 1.00

Figure S32. <sup>13</sup>C NMR (150 MHz, DMSO-*d*<sub>6</sub>) for compound 71.
